# Supplementary material for: Understanding the gender gap in antibiotic prescribing: a cross-sectional analysis of English primary care
Source: PubMed Central journal article supplement — BMJ Open. 2018 Feb 22;8(2):e020203. doi: 10.1136/bmjopen-2017-020203 (PMC5855331; doi:10.1136/bmjopen-2017-020203), 2018-02-22
Supplement: bmjopen-2017-020203.draft_revisions.pdf [file bmjopen-2017-020203.draft_revisions.pdf]

# BMJ Open

BMJ Open is committed to open peer review. As part of this commitment we make the peer review history of every article we publish publicly available.

When an article is published we post the peer reviewers' comments and the authors' responses online. We also post the versions of the paper that were used during peer review. These are the versions that the peer review comments apply to.

The versions of the paper that follow are the versions that were submitted during the peer review process. They are not the versions of record or the final published versions. They should not be cited or distributed as the published version of this manuscript.

BMJ Open is an open access journal and the full, final, typeset and author-corrected version of record of the manuscript is available on our site with no access controls, subscription charges or pay-per-view fees (<http://bmjopen.bmj.com>).

If you have any questions on BMJ Open's open peer review process please email [editorial.bmjopen@bmj.com](mailto:editorial.bmjopen@bmj.com)

# BMJ Open

## Understanding the gender gap in antibiotic prescribing: a cross-sectional analysis of English primary care

|                                 |                                                                                                                                                                                                                                                                                                                                                                                                                                                                                                                                                                                                                                                                    |
|---------------------------------|--------------------------------------------------------------------------------------------------------------------------------------------------------------------------------------------------------------------------------------------------------------------------------------------------------------------------------------------------------------------------------------------------------------------------------------------------------------------------------------------------------------------------------------------------------------------------------------------------------------------------------------------------------------------|
| Journal:                        | <i>BMJ Open</i>                                                                                                                                                                                                                                                                                                                                                                                                                                                                                                                                                                                                                                                    |
| Manuscript ID                   | bmjopen-2017-020203                                                                                                                                                                                                                                                                                                                                                                                                                                                                                                                                                                                                                                                |
| Article Type:                   | Research                                                                                                                                                                                                                                                                                                                                                                                                                                                                                                                                                                                                                                                           |
| Date Submitted by the Author:   | 20-Oct-2017                                                                                                                                                                                                                                                                                                                                                                                                                                                                                                                                                                                                                                                        |
| Complete List of Authors:       | Smith, David; Public Health England, Modelling and Economics Unit, National Infection Service<br>Dolk, Christiaan; University of Groningen, PharmacoTherapy, - Epidemiology & -Economics, Department of Pharmacy<br>Smieszek, Timo; Public Health England, Modelling and Economics Unit, National Infection Service<br>Robotham, Julie; Public Health England, Modelling and Economics Unit, National Infection Service<br>Pouwels, Koen; Public Health England, Modelling and Economics Unit, National Infection Service; Imperial College School of Public Health, MRC Centre for Outbreak Analysis and Modelling, Department of Infectious Disease Epidemiology |
| <b>Primary Subject Heading</b>: | General practice / Family practice                                                                                                                                                                                                                                                                                                                                                                                                                                                                                                                                                                                                                                 |
| Secondary Subject Heading:      | Health services research, Public health                                                                                                                                                                                                                                                                                                                                                                                                                                                                                                                                                                                                                            |
| Keywords:                       | anti-bacterial agents, prescriptions, electronic health records, antibiotic prescribing, consultation, gender bias                                                                                                                                                                                                                                                                                                                                                                                                                                                                                                                                                 |
|                                 |                                                                                                                                                                                                                                                                                                                                                                                                                                                                                                                                                                                                                                                                    |

SCHOLARONE™  
Manuscripts

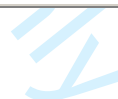

1  
2  
3  
4  
5  
6  
7  
8  
9  
10  
11  
12  
13  
14  
15  
16  
17  
18  
19  
20  
21  
22  
23  
24  
25  
26  
27  
28  
29  
30  
31  
32  
33  
34  
35  
36  
37  
38  
39  
40  
41  
42  
43  
44  
45  
46  
47  
48  
49  
50  
51  
52  
53  
54  
55  
56  
57  
58  
59  
60

1 **Understanding the gender gap in antibiotic prescribing: a cross-sectional analysis of**

2 **English primary care**

3 David RM Smith<sup>1\*†</sup>, F Christiaan K Dolk<sup>1,2\*</sup>, Timo Smieszek<sup>1,3</sup>, Julie V Robotham<sup>1</sup>, Koen B

4 Pouwels<sup>1,2,3</sup>

5 1. Modelling and Economics Unit, National Infection Service, Public Health England, London,  
6 United Kingdom.

7 2. PharmacoTherapy, -Epidemiology & -Economics, Department of Pharmacy, University of  
8 Groningen, Groningen, The Netherlands.

9 3. MRC Centre for Outbreak Analysis and Modelling, Department of Infectious Disease  
10 Epidemiology, Imperial College School of Public Health, London, United Kingdom.

11 \* shared first author

12 † corresponding author: [david.r.m.smith@phe.gov.uk](mailto:david.r.m.smith@phe.gov.uk) ; +44 20 8327 6651 ; 61 Colindale Ave,  
13 London UK, NW9 5EQ

14 Word count: 2635

15

1  
2  
3 16 Abstract  
4

5 17 **Objectives:** To explore the degree to which the gender gap in antibiotic prescribing is driven  
6  
7 18 by prescribing behaviour, consultation behaviour, comorbidity and urinary tract infection  
8  
9 19 (UTI).

10  
11  
12 20 **Design:** Cross-sectional analysis of patient consultation and antibiotic prescribing.  
13

14 21 **Setting:** English primary care.  
15

16 22 **Participants:** Patients who consulted general practices registered with The Health  
17  
18  
19 23 Improvement Network between 2013 and 2015.  
20

21 24 **Primary and secondary outcome measures:** Total antibiotic prescribing was measured in  
22  
23 25 children (<19 years), adults (19 – 64) and the elderly (65+). For twelve common conditions,  
24  
25 26 the number of adult consultations was measured, and the relative risk (RR) of being  
26  
27 27 prescribed antibiotics when consulting as female or with comorbidity was estimated.  
28  
29

30 28 **Results:** Female patients received 67% more antibiotic prescriptions than males, and 43%  
31  
32 29 more when excluding antibiotics used to treat UTI (trimethoprim and nitrofurantoin). These  
33  
34 30 gaps were more pronounced in adult women (99% more prescriptions than males; 69%  
35  
36 31 more when excluding UTI) than in children (9%; 0%) or the elderly (67%; 38%). Among  
37  
38 32 adults, women accounted for 64% of consultations (61% among patients with comorbidity),  
39  
40 33 but were not substantially more likely than men to receive an antibiotic prescription when  
41  
42 34 consulting with common conditions such as cough (RR 1.01; CI 1.00 – 1.02), sore throat (RR  
43  
44 35 1.01, CI 1.00 – 1.01) and lower respiratory tract infection (RR 1.00, CI 1.00 – 1.01).  
45  
46  
47

48 36 Exceptions were skin conditions: women were less likely to be prescribed antibiotics when  
49  
50 37 consulting with acne (RR 0.67, CI 0.66 – 0.69) or impetigo (RR 0.85, CI 0.81 – 0.88).  
51  
52

53 38 **Conclusions:** The gender gap in antibiotic prescribing can largely be explained by  
54  
55 39 consultation behaviour. Although in most cases adult men and women are equally likely to  
56  
57

1  
2  
3 40 be prescribed an antibiotic when consulting primary care, it is unclear whether or not they  
4  
5 41 are equally indicated for antibiotic therapy.  
6

7 42

8  
9  
10 43 Strengths and limitations of this study:

- 11  
12 44 • This study is one of the first to explore the underlying causes of the large gap in the  
13  
14 45 number of antibiotics prescribed to men and women in primary care.  
15  
16 46 • Findings are derived from a large, representative sample of primary care patients in  
17  
18 47 England.  
19  
20  
21 48 • Extensive mapping of Read (diagnostic) codes to clinical conditions made it possible  
22  
23 49 to analyse prescribing across a range of conditions and to account for comorbidity.  
24  
25  
26 50 • Identification of antibiotics that are used to treat UTI but rarely other conditions  
27  
28 51 (trimethoprim and nitrofurantoin) allowed for approximation of UTI prescribing  
29  
30 52 despite incomplete diagnostic coding.  
31  
32  
33 53 • The data do not include indicators of antibiotic appropriateness, such as severity of  
34  
35 54 illness, and so the clinical appropriateness of gender differences in prescribing could  
36  
37 55 not be evaluated.  
38

39  
40 56  
41  
42  
43  
44  
45  
46  
47  
48  
49  
50  
51  
52  
53  
54  
55  
56  
57  
58  
59  
60

## 57 **Introduction**

58 Reducing the unnecessary use of antibiotics is as an essential means of mitigating the  
59 emergence of antimicrobial resistance (AMR) and its associated costs.[1,2] However,  
60 prescribing reductions are not without risk. The causes and magnitudes of prescribing vary  
61 substantially between practices and prescribers,[3-5] and sweeping, uncalibrated  
62 interventions could jeopardise some patients while failing to prevent unnecessary  
63 prescribing in others. In order to safely and effectively reduce antibiotic use, it is imperative  
64 to understand how and to whom antibiotics are prescribed.

65  
66 Gender is a key determinant of antibiotic prescribing. A recent meta-analysis across primary  
67 care in nine high-income countries found that females received more antibiotics than males  
68 in all age groups except those >75, with women aged 16 to 54 receiving 36% to 40% more  
69 antibiotics than men of the same age.[6] Similarly, across English and Welsh primary care,  
70 the rate of antibiotic prescribing has been found to be 40% higher in female than in male  
71 patients.[7] Although the latter figure dates from 1996, gender disparities in England have  
72 more recently been observed in out-of-hours and paediatric care, with women and girls  
73 receiving more antibiotic prescriptions than men and boys.[8,9]

74  
75 There are several proposed explanations for this gender gap in antibiotic prescribing. First,  
76 some infectious diseases affect men and women differently. In particular, urinary tract  
77 infection (UTI) is more common in adult women than in men and accounts for over 20% of  
78 antibiotic prescriptions in English primary care.[10,11] However, respiratory tract infections  
79 (RTIs) account for more than twice as many prescriptions as UTI,[11] and women are not  
80 more susceptible to these conditions than men,[12,13] although gender differences in

1  
2  
3 81 comorbidity may underlie some variation in prescribing. Second, as in many  
4  
5 82 countries,[14,15] women in the UK consult their general practitioner (GP) more often than  
6  
7 83 men.[16-18] Although consultation rate is linked to antibiotic prescribing,[5] it is not clear to  
8  
9 84 what extent gender differences in antibiotic prescribing can be explained by gender  
10  
11 85 differences in health-seeking behaviour. Finally, social and behavioural factors may play a  
12  
13 86 role. For example, men and women communicate differently with health professionals, and  
14  
15 87 prescribers may have biases that cause them to be more willing to prescribe antibiotics  
16  
17 88 during consultations with women than with men.[19,20]  
18  
19  
20  
21  
22

23 90 Here, the gender gap in antibiotic prescribing was analysed using a large, representative  
24  
25 91 sample of primary care patients in England. Antibiotic prescribing in male and female  
26  
27 92 children, adults and the elderly was compared at the population level. The influence of  
28  
29 93 gender on prescribing was assessed by controlling for consultation and comorbidity, and  
30  
31 94 calculating the proportions of men and women that received antibiotic prescriptions when  
32  
33 95 presenting to primary care with a suite of common conditions. These prescribing  
34  
35 96 proportions facilitate a deeper understanding of the causes of the gender gap in antibiotic  
36  
37 97 prescribing, and may inform prescribing intervention design.  
38  
39  
40  
41  
42  
43

## 44 99 **Methods**

45  
46 100 This study used data from English general practices registered with The Health Improvement  
47  
48 101 Network (THIN), a UK-based primary care electronic medical record database. Practices  
49  
50 102 were included that provided data for at least one full calendar year between January 1,  
51  
52 103 2013 and December 31, 2015; there were 349 such practices in 2013, 285 in 2014 and 191 in  
53  
54 104 2015. Anonymised patient data were extracted from these practices that met acceptable  
55  
56  
57  
58  
59  
60

1  
2  
3 105 standards for research data collection. All systemic antibiotic prescriptions (antibiotics from  
4  
5 106 British National Formulary chapter 5.1,[21] excluding antituberculosis and antileprosy drugs)  
6  
7 107 recorded in THIN were analysed by patient gender and age. Patient age at the time of  
8  
9 108 consultation was used to classify patients as children (aged 0-18 years), adults (19-64 years)  
10  
11  
12 109 and the elderly (65+ years).

13  
14 110

15  
16 111 Read codes (the diagnostic codes used in THIN) were analysed to quantify the number of  
17  
18 112 male and female consultations for acute presentations of 12 common conditions that are  
19  
20 113 treated with antibiotics to varying degrees: acne, bronchitis, chronic obstructive pulmonary  
21  
22 114 disease (COPD), cough, gastroenteritis, impetigo, influenza-like illness (ILI), lower respiratory  
23  
24 115 tract infection (LRTI), otitis media, sinusitis, sore throat and upper respiratory tract infection  
25  
26 116 (URTI). A vast number of Read codes are used in THIN, and the methods used to assign  
27  
28 117 specific Read codes to different conditions and to link Read codes to acute antibiotic  
29  
30 118 prescriptions are described elsewhere.[11] The ratio of female to male consultations (F:M)  
31  
32 119 was then calculated to quantify gender differences in consultation for each of these  
33  
34 120 conditions.

35  
36  
37 121

38  
39  
40 122 In THIN, a large proportion of UTI consultations are poorly coded, particularly in patients  
41  
42 123 consulting for UTI prophylaxis or chronic/recurrent UTI. However, in English primary care  
43  
44 124 the antibiotics used to prevent and treat the vast majority of UTIs – trimethoprim and  
45  
46 125 nitrofurantoin – are rarely used for other conditions.[11] Prescriptions of trimethoprim and  
47  
48 126 nitrofurantoin were thus used as a proxy measure for prescribing for UTI.

49  
50  
51 127



1  
2  
3 128 Prescribing proportions were then calculated by dividing the total number of prescriptions  
4  
5 129 for a given condition by the number of consultations for that condition. To account for  
6  
7 130 patients that consulted more than once, robust standard errors were used when calculating  
8  
9 131 prescribing proportions. These data were also used to calculate the relative risk (RR) of  
10  
11 132 being prescribed an antibiotic when consulting as female as opposed to male. In the main  
12  
13 133 analysis, consultations were included if they occurred at a patient's primary registered  
14  
15 134 practice, but in a sensitivity analysis all patient consultations recorded in THIN were  
16  
17 135 included. Patients with comorbidity were analysed separately from otherwise 'healthy'  
18  
19 136 patients (i.e., those without comorbidity) to minimise potential biases in consultation and  
20  
21 137 prescribing due to gender differences in background health status. Further, the RR of being  
22  
23 138 prescribed an antibiotic when consulting with comorbidity was also calculated for each  
24  
25 139 condition and gender. Comorbidities were identified by the Read codes that indicate  
26  
27 140 qualification for the free seasonal influenza vaccination programme: asthma, chronic heart  
28  
29 141 disease, chronic kidney disease, chronic liver disease, chronic neurological disease and  
30  
31 142 immunosuppressive disease.[22] Patients who received at least two prescriptions of  
32  
33 143 systemic or inhaled corticosteroids or immunosuppressive drugs in the 365 days prior to  
34  
35 144 their consultation were also included in this group, since these drugs indicate an increased  
36  
37 145 risk of serious complications after (respiratory tract) infections.[22]  
38  
39  
40  
41  
42  
43

44 146

45  
46 147 All data were analysed using STATA 13.1 and R version 3.1.  
47  
48

49 148

## 50 51 149 **Results**

52  
53 150 Of all antibiotic prescriptions observed in THIN between 2013 and 2015 (n=4,574,363), the  
54  
55 151 majority (62.6%) were in female patients (Figure 1). Adult women received approximately  
56  
57

1  
2  
3 152 twice (99.0%) as many antibiotic prescriptions as adult men, whereas elderly women and  
4  
5 153 girls received 67.4% and 9.2% more prescriptions, respectively, than elderly men and boys.  
6  
7 154 Nitrofurantoin and trimethoprim accounted for 17.1% of all prescriptions, 81.3% of which  
8  
9 155 were prescribed to female patients. The prescribing gender gap narrowed in all age groups  
10  
11 156 when these antibiotics were removed, and became negligible in children (0.3%), but adult  
12  
13 157 and elderly women still received, respectively, 69.2% and 37.7% more antibiotic  
14  
15 158 prescriptions than adult and elderly men.  
16  
17  
18  
19  
20

21 160 Healthy adult women consulted primary care more than men for the 12 conditions included  
22  
23 161 in this study, accounting for 64.3% of all consultations (61.9% among patients with  
24  
25 162 comorbidity). The biggest gender gaps in consultation were in acne (F:M 2.90) and sinusitis  
26  
27 163 (F:M 2.78). However, there was little gender difference in the proportions of healthy adult  
28  
29 164 patients that received antibiotic prescriptions when consulting (Table 1). The greatest gaps  
30  
31 165 were in acne, where 60% of consulting men received systemic antibiotics compared to 41%  
32  
33 166 of women (RR 0.67; CI 0.66 – 0.69), and in impetigo, where, respectively, 62% and 52% of  
34  
35 167 men and women received prescriptions (RR 0.85, CI 0.81 – 0.88). In all other conditions, the  
36  
37 168 difference between the proportions of men and women that received antibiotic  
38  
39 169 prescriptions when consulting was  $\leq 2\%$ , although these gaps were statistically significant in  
40  
41 170 cough (F>M,  $p=0.02$ ), LRTI (F>M,  $p=0.02$ ), sinusitis (F>M,  $p<0.001$ ) and URTI (M>F,  $p<0.001$ ).  
42  
43 171 These results held in a sensitivity analysis when consultations and prescriptions outside of  
44  
45 172 patients' primary registered practice were included (see online supplementary appendix).  
46  
47 173 Further, with the exception of acne and impetigo, the proportions of all antibiotics  
48  
49 174 prescribed to men and women for different conditions are proportionate to the proportions  
50  
51 175 of all consultations made by men and women for those conditions (Figure 2). Accordingly,  
52  
53  
54  
55  
56  
57  
58  
59  
60

176 the proportions of all antibiotics prescribed to women for each condition correlate strongly  
 177 with the proportions of consultations made by women (Spearman's  $\rho=0.92$ ;  $p<0.001$ ), but  
 178 not with the proportions of women that received prescriptions when consulting with those  
 179 conditions (Spearman's  $\rho=0.28$ ,  $p=0.38$ ).

180

181 **Table 1.** Primary care consultations and antibiotic prescribing proportions per consultation  
 182 in adult men and women (aged 19 – 64 years) with and without comorbidity for 12 different  
 183 conditions. Only consultations from patients' primary registered practices are included.

|                                       | Number of consultations (% of total) |               | F:M consultation ratio | Proportion of patients receiving prescription when consulting (95% CI) |                 | Relative risk of receiving antibiotic prescription when consulting as female (95% CI) |
|---------------------------------------|--------------------------------------|---------------|------------------------|------------------------------------------------------------------------|-----------------|---------------------------------------------------------------------------------------|
|                                       | Women                                | Men           |                        | Women                                                                  | Men             |                                                                                       |
| Acne                                  | 25,676 (74%)                         | 8,864 (26%)   | 2.90                   | 41% (40% – 41%)                                                        | 60% (59% – 61%) | 0.67 (0.66 – 0.69) ( $p<0.001$ )                                                      |
| Acne with comorbidity                 | 2,344 (66%)                          | 1,185 (34%)   | 1.98                   | 40% (38% – 42%)                                                        | 55% (52% – 58%) | 0.73 (0.68 – 0.78) ( $p<0.001$ )                                                      |
| Bronchitis                            | 7,085 (61%)                          | 4,584 (39%)   | 1.55                   | 83% (83% – 84%)                                                        | 84% (83% – 86%) | 0.99 (0.97 – 1.00) ( $p=0.14$ )                                                       |
| Bronchitis with comorbidity           | 3,101 (60%)                          | 2,065 (40%)   | 1.50                   | 87% (86% – 89%)                                                        | 89% (88% – 91%) | 0.98 (0.96 – 1.00) ( $p=0.03$ )                                                       |
| COPD                                  | 3,274 (59%)                          | 2,271 (41%)   | 1.44                   | 76% (74% – 78%)                                                        | 75% (73% – 77%) | 1.02 (0.99 – 1.05) ( $p=0.25$ )                                                       |
| COPD with non-respiratory comorbidity | 1,287 (56%)                          | 1,029 (44%)   | 1.25                   | 73% (70% – 76%)                                                        | 70% (69% – 72%) | 1.06 (1.01 – 1.11) ( $p=0.02$ )                                                       |
| Cough                                 | 158,614 (61%)                        | 103,058 (39%) | 1.54                   | 48% (48% – 49%)                                                        | 48% (48% – 48%) | 1.01 (1.00 – 1.02) ( $p=0.02$ )                                                       |
| Cough with comorbidity                | 68,353 (60%)                         | 46,210 (40%)  | 1.48                   | 58% (57% – 58%)                                                        | 56% (56% – 57%) | 1.03 (1.02 – 1.04) ( $p<0.001$ )                                                      |
| Gastroenteritis                       | 41,870 (58%)                         | 30,810 (42%)  | 1.36                   | 6% (6% – 6%)                                                           | 6% (6% – 6%)    | 1.01 (0.96 – 1.08) ( $p=0.65$ )                                                       |
| Gastroenteritis with comorbidity      | 12,184 (57%)                         | 9,216 (43%)   | 1.32                   | 8% (7% – 8%)                                                           | 7% (7% – 8%)    | 1.03 (0.94 – 1.14) ( $p=0.49$ )                                                       |
| ILI                                   | 10,569 (57%)                         | 7,946 (43%)   | 1.33                   | 20% (19% – 20%)                                                        | 19% (18% – 20%) | 1.02 (0.96 – 1.09) ( $p=0.47$ )                                                       |
| ILI with comorbidity                  | 1,951 (57%)                          | 1,468 (43%)   | 1.33                   | 25% (23% – 27%)                                                        | 29% (27% – 31%) | 0.87 (0.78 – 0.97) ( $p=0.02$ )                                                       |
| Impetigo                              | 5,272 (64%)                          | 2,907 (36%)   | 1.81                   | 52% (51% – 54%)                                                        | 62% (60% – 63%) | 0.85 (0.81 – 0.88) ( $p<0.001$ )                                                      |
| Impetigo with comorbidity             | 1,139 (66%)                          | 598 (34%)     | 1.90                   | 54% (51% – 57%)                                                        | 63% (58% – 66%) | 0.86 (0.80 – 0.94) ( $p<0.001$ )                                                      |
| LRTI                                  | 52,996 (60%)                         | 35,777 (40%)  | 1.48                   | 91% (91% – 92%)                                                        | 91% (91% – 91%) | 1.00 (1.00 – 1.01) ( $p=0.02$ )                                                       |
| LRTI with comorbidity                 | 36,693 (60%)                         | 24,519 (40%)  | 1.50                   | 91% (90% – 91%)                                                        | 90% (89% – 90%) | 1.01 (1.01 – 1.02) ( $p<0.001$ )                                                      |
| Otitis                                | 11,773                               | 6,545         | 1.80                   | 84% (84% –                                                             | 84% (83% –      | 1.00 (0.99 – 1.02) ( $p=0.58$ )                                                       |

|                               |               |              |      |                 |                 |                              |
|-------------------------------|---------------|--------------|------|-----------------|-----------------|------------------------------|
| media                         | (64%)         | (36%)        |      | 85%             | 85%             |                              |
| Otitis media with comorbidity | 2,556 (65%)   | 1,400 (35%)  | 1.83 | 85% (84% – 87%) | 84% (82% – 86%) | 1.01 (0.98 – 1.04) (p=0.41)  |
| Sinusitis                     | 46,221 (74%)  | 16,625 (26%) | 2.78 | 88% (88% – 89%) | 86% (86% – 87%) | 1.02 (1.02 – 1.03) (p<0.001) |
| Sinusitis with comorbidity    | 12,013 (73%)  | 4,394 (27%)  | 2.73 | 90% (90% – 91%) | 89% (88% – 90%) | 1.02 (1.00 – 1.03) (p=0.006) |
| Sore throat                   | 136,117 (68%) | 65,531 (32%) | 2.08 | 57% (56% – 57%) | 57% (56% – 57%) | 1.00 (0.99 – 1.01) (p=0.67)  |
| Sore throat with comorbidity  | 24,376 (67%)  | 11,968 (33%) | 2.04 | 53% (52% – 54%) | 50% (49% – 51%) | 1.06 (1.04 – 1.08) (p<0.001) |
| URTI                          | 90,295 (68%)  | 42,998 (32%) | 2.10 | 34% (34% – 34%) | 36% (35% – 36%) | 0.96 (0.94 – 0.97) (p<0.001) |
| URTI with comorbidity         | 22,995 (65%)  | 12,515 (35%) | 1.84 | 45% (45% – 46%) | 45% (44% – 46%) | 1.00 (0.98 – 1.02) (p=0.96)  |

184

185

186 These gender differences in prescribing were broadly similar among adults with

187 comorbidity. Women with comorbidity were substantially less likely than men with

188 comorbidity to receive antibiotic prescriptions when consulting with acne (RR 0.73, CI 0.68 –

189 0.78) or impetigo (RR 0.86, CI 0.80 – 0.94) (Table 1), and also ILI (RR 0.87, CI 0.78 – 0.97), but

190 for all other conditions the difference between the proportions of men and women that

191 received prescriptions when consulting was  $\leq 3\%$ . Again, among patients with comorbidity,

192 the proportions of antibiotics prescribed to women for each condition correlate strongly

193 with the proportions of consultations made by women (Spearman's  $\rho=0.78$ ;  $p=0.005$ ), but

194 not with the proportion of women that received prescriptions when consulting with those

195 conditions (Spearman's  $\rho=0.41$ ,  $p=0.19$ ).

196

197 Patients with comorbidity were generally more likely than those without comorbidity to

198 receive antibiotic prescriptions when consulting (see online supplementary appendix). In

199 both men and women the greatest of these differences were in URTI, cough and ILI, where

200 the proportion of patients that received antibiotics when consulting was approximately 6-

1  
2  
3 201 12% higher among patients with comorbidity. Patients with comorbidity were also more  
4  
5 202 likely to receive a prescription when consulting with bronchitis, gastroenteritis and sinusitis.  
6  
7 203 However, among women consulting with sore throat and LRTI, and among men consulting  
8  
9 204 with sore throat, LRTI and acne, the proportions of patients that received antibiotics when  
10  
11 205 consulting was significantly lower among patients with comorbidity than among otherwise  
12  
13  
14 206 healthy patients.  
15

16  
17 207

## 18 208 **Discussion**

19  
20  
21 209 This study affirms that there is still a substantial gender gap in antibiotic prescribing in  
22  
23 210 English primary care, and shows that this gap is in large part unexplained by biased  
24  
25 211 prescribing behaviour and gender differences in UTI and comorbidity. The prescribing gap is  
26  
27 212 most pronounced in adults, with women receiving approximately twice as many antibiotic  
28  
29 213 prescriptions as men, and 70% more when excluding antibiotics used to treat UTI. These  
30  
31 214 differences in prescribing are proximate to differences in health-seeking behaviour, with  
32  
33 215 healthy adult women consulting primary care approximately 80% more than healthy adult  
34  
35 216 men across the 12 conditions included in this study. Accordingly, men and women are just  
36  
37 217 as likely to be prescribed antibiotics when consulting with most common RTIs. These  
38  
39 218 findings provide strong support for the hypothesis that higher antibiotic prescribing in adult  
40  
41 219 women is primarily driven by a higher consultation rate.  
42  
43

44  
45 220

46  
47  
48 221 This study has a number of strengths. First, THIN is a robust data source that is  
49  
50 222 representative of the English primary care patient population.[23] Second, the extensive  
51  
52 223 mapping of Read codes to clinical conditions made it possible to analyse prescribing across a  
53  
54 224 range of conditions and to account for comorbidities, which differ between men and  
55  
56  
57

1  
2  
3 225 women and influence whether or not a practitioner prescribes. Third, since UTI in English  
4  
5 226 primary care is almost always treated with trimethoprim or nitrofurantoin, and since these  
6  
7 227 antibiotics are rarely used to treat other conditions in primary care,[11] it was possible to  
8  
9 228 approximate total prescribing for UTI despite incomplete diagnostic coding. There were also  
10  
11 229 limitations to this work, the largest being that the clinical appropriateness of prescribing  
12  
13 230 could not be determined, and so it was not possible to evaluate whether consulting men  
14  
15 231 and women are differently indicated for antibiotics, and hence whether equal prescribing  
16  
17 232 proportions in RTIs are clinically justified. Further, other patient characteristics that may co-  
18  
19 233 vary with gender and consultation behaviour, such as socioeconomic status, could not be  
20  
21 234 considered. Finally, the quality of diagnostic coding varies within and between practices,  
22  
23 235 which may bias estimates of consultation and prescribing.  
24  
25  
26  
27  
28  
29

30 237 It is well observed that rates of primary care consultation and antibiotic prescribing are  
31  
32 238 substantially higher in adult women than in adult men,[6-9,16-18] but previous studies have  
33  
34 239 been unable to show that the gender gap in antibiotic prescribing can primarily be  
35  
36 240 attributed to consultation, as opposed to other relevant factors such as UTI, comorbidity  
37  
38 241 and other patient and prescriber behaviours. These findings builds on a previous study of  
39  
40 242 prescribing in UK primary care between 1997 and 2006, which found similar male and  
41  
42 243 female prescribing proportions in a selection of RTIs, but was conducted in a limited subset  
43  
44 244 of patients, did not consider prescribing for UTI, and did not account for comorbidities, non-  
45  
46 245 respiratory conditions, or patients consulting outside of their registered practice.[24]  
47  
48  
49  
50

51 246

52  
53 247 Antibiotic prescribing was proportionate to consultation for most conditions, but skin  
54  
55 248 conditions were notable exceptions: men consulted much less with acne and impetigo but  
56  
57

1  
2  
3 249 were substantially more likely than women to receive an antibiotic prescription when  
4  
5 250 consulting (although acne is unique in that women but not men can be treated with  
6  
7 251 combination oral contraceptives, confounding gender comparisons in antibiotic prescribing).  
8  
9  
10 252 Although women consult more frequently, they are not known to suffer from greater  
11  
12 253 incidence or severity of disease in the conditions included here.[12,13] Studies have also  
13  
14 254 shown that men tend to consult later in the course of their illness and may have a higher  
15  
16 255 threshold to seeking care.[17,25,26] When prescribing is truly reflective of patient need  
17  
18 256 (e.g., as in skin conditions, due to low diagnostic uncertainty), a higher prescribing  
19  
20  
21 257 proportion in men may be expected if, on average, less frequent and/or delayed  
22  
23 258 consultation is coupled with more severe clinical presentation. Yet, for the remaining  
24  
25  
26 259 conditions in this study – predominantly RTIs – prescribing proportions in male and female  
27  
28 260 patients were strikingly similar despite vast differences in consultation. This may be  
29  
30 261 indicative of imprudent prescribing. In non-skin conditions there is often (i) considerable  
31  
32 262 diagnostic uncertainty (e.g., difficulty in differentiating acute bronchitis and pneumonia in  
33  
34 263 primary care) and (ii) uncertainty around subjective, insensitive or unspecific clinical severity  
35  
36 264 markers (e.g., reliance on patient symptom reporting and other clinical features that poorly  
37  
38 265 predict benefit from antibiotic treatment).[27,28] Faced by these uncertainties, GPs may  
39  
40 266 prescribe antibiotics cautiously – and imprudently – to a large proportion of patients  
41  
42  
43 267 with RTI, regardless of disease severity, resulting in high prescribing proportions in all  
44  
45  
46 268 patients.  
47  
48  
49 269  
50  
51 270 Although imprudent prescribing has been the target of numerous antimicrobial stewardship  
52  
53 271 interventions, it remains obstinate in English primary care,[29] and the combination of high  
54  
55 272 consultation rates among female patients and overly cautious antibiotic prescribing

1  
2  
3 273 behaviour among GPs could result in a disproportionate share of inappropriate (i.e.,  
4  
5 274 unnecessary) antibiotic prescriptions in women. However, previous studies of gender  
6  
7 275 differences in inappropriate prescribing have found mixed results,[6,30] and it remains to be  
8  
9 276 shown whether men and women in UK primary care differ in their objective clinical need for  
10  
11 277 antibiotics when consulting with RTIs and other common conditions. Yet, regardless of  
12  
13 278 whether or not women are more likely to receive an inappropriate prescription per  
14  
15 279 consultation, it is likely that a higher level of antibiotic prescribing in women is accompanied  
16  
17 280 by a greater total number of inappropriate prescriptions.  
18  
19  
20  
21  
22

## 23 282 *Conclusions*

24  
25 283 This study reaffirms known gender gaps in health-seeking behaviour and antibiotic  
26  
27 284 prescribing, and shows that, with exceptions, adult men and women in English general  
28  
29 285 practice are equally likely to receive an antibiotic prescription when seeking care for  
30  
31 286 common conditions, and that gender differences in the number of antibiotics prescribed are  
32  
33 287 largely driven by differences in consultation behaviour. Equal prescribing proportions may  
34  
35 288 seem to indicate relative parity in how men and women are treated when they consult, but  
36  
37 289 women consult vastly more than men yet have not been shown to suffer from more  
38  
39 290 frequent or severe infection in the conditions included in this study. It is thus plausible that  
40  
41 291 a higher rate of consultation in women is coupled with a milder average clinical  
42  
43 292 presentation, but that overly precautionous GPs prescribe even when antibiotics are not  
44  
45 293 clinically necessary, resulting in high rates of prescribing in all patients. Given the urgent  
46  
47 294 need to reduce unnecessary antibiotic prescribing, it is crucial to more deeply understand  
48  
49 295 how and to whom antibiotics are overprescribed. To this end, future work should further  
50  
51  
52  
53  
54  
55  
56  
57  
58  
59  
60



1  
2  
3 296 investigate the clinical (in)appropriateness of gender differences in antibiotic prescribing in  
4  
5 297 primary care.

6  
7 298

8  
9 299 Figure captions

10  
11 300 **Figure 1.** All systemic antibiotic prescriptions recorded in THIN between 2013 and 2015,  
12 301 stratified by gender and age group. Antibiotics used to treat UTI (trimethoprim and  
13 302 nitrofurantoin) are identified separately from all other antibiotics.

14  
15  
16 303 **Figure 2.** For common conditions in general practice, the proportions all consultations  
17 304 (circles) and antibiotic prescriptions (triangles) attributed to women (red) and men (blue).  
18 305 Consultations and prescriptions include all adult patients (aged 19-64) without comorbidity  
19 306 consulting at their primary registered practice. Conditions are ordered by consultation  
20 307 proportion.

21  
22 308  
23  
24  
25 309 Additional information

26  
27 310 **Contributors:** KP and DS conceived and designed the study. KP extracted the data from The  
28 311 Health Improvement Network database. CD and KP conducted the analyses. DS, JR, KP and  
29 312 TS carried out interpretation of the data. DS drafted the manuscript. CD, JR, KP and TS  
30 313 critically revised the manuscript for important intellectual content. All authors approved the  
31 314 final version prior to submission.

32  
33 315 **Funding:** This work was funded internally by Public Health England.

34  
35 316 **Competing interests:** None.

36  
37 317 **Ethics approval:** This study received approval from THIN's Scientific Review Committee  
38 318 (reference number 16THIN-071-A2).

39  
40 319 **Data sharing statement:** This analysis is based on a large sample from The Health  
41 320 Improvement Network, provided by IMS Health. The authors' license for using these data  
42 321 precludes the sharing of raw data with third parties.

43  
44 322

## 323 References:

- 324 1. Chief Medical Officer. *UK Five Year Antimicrobial Resistance Strategy 2013 to 2018*. London:  
325 Department of Health, 2013.
- 326 2. Shallcross LJ, Davies SC. Antibiotic overuse: a key driver of antimicrobial resistance. *Br J Gen Pract*  
327 2014;64:604-5.
- 328 3. Butler CC, Rollnick S, Pill R *et al*. Understanding the culture of prescribing: qualitative study of general  
329 practitioners' and patients' perceptions of antibiotics for sore throats. *BMJ* 1998;317:637.
- 330 4. Cadieux G, Tamblyn R, Dauphinee D *et al*. Predictors of inappropriate antibiotic prescribing among  
331 primary care physicians. *CMAJ* 2007;177:877-83.
- 332 5. Pouwels KB, Dolk FCK, Smith DRM *et al*. Antibiotics in English primary care IV: explaining variation in  
333 antibiotic prescribing between general practices. *J Antimicrob Chemother*. Submitted.
- 334 6. Schröder W, Sommer H, Primrose Gladstone B *et al*. Gender differences in antibiotic prescribing in the  
335 community: a systematic review and meta-analysis. *J Antimicrob Chemother* 2016;71:1800-6.
- 336 7. Majeed A, Moser K. Age- and sex-specific antibiotic prescribing patterns in general practice in England  
337 and Wales in 1996. *Br J Gen Pract* 1999;49:735-6.
- 338 8. Hayward GN, Fisher RE, Spence GT *et al*. Increase in antibiotic prescriptions in out-of-hours primary  
339 care in contrast to in-hours primary care prescriptions: service evaluation in a population of 600 000  
340 patients. *J Antimicrob Chemother* 2016;71:2612-9.
- 341 9. Schneider-Lindner V, Quach C, Hanley JA *et al*. Secular trends of antibacterial prescribing in UK  
342 paediatric primary care. *J Antimicrob Chemother* 2011;66:424-33.
- 343 10. Foxman B. The epidemiology of urinary tract infection. *Nat Rev Urol* 2010;7:653-60.
- 344 11. Dolk FCK, Pouwels KB, Smith DRM *et al*. Antibiotics in English primary care I: which antibiotics are  
345 prescribed and for which conditions? *J Antimicrob Chemother*. Submitted.
- 346 12. Gutiérrez F, Masiá M, Mirete C *et al*. The influence of age and gender on the population-based  
347 incidence of community-acquired pneumonia caused by different microbial pathogens. *J Infect*  
348 2006;53:166-74.
- 349 13. Falagas M, Mourtzoukou EG, Vardakas KZ. Sex differences in the incidence and severity of respiratory  
350 tract infections. *Resp ir Med* 2007;101:1845-63.
- 351 14. Pinkhasov RM, Wong J, Kashanian J *et al*. Are men shortchanged on health? Perspective on health  
352 care utilization and health risk behavior in men and women in the United States. *Int J Clin Pract*  
353 2010;64:475-87.
- 354 15. Vos HM, Schellevis FG, van den Berkmoortel H *et al*. Does prevention of risk-behaviour in primary care  
355 require a gender-specific approach? A cross-sectional study. *Fam Pract* 2013;30:179-84.
- 356 16. Wang Y, Hunt K, Nazareth I *et al*. Do men consult less than women? An analysis of routinely collected  
357 UK general practice data. *BMJ Open* 2013;3:e003320.
- 358 17. Galdas PM, Cheater F, Marshall P. Men and health help-seeking behaviour: literature review. *J Adv*  
359 *Nurs* 2005;49:616-23.

- 1  
2  
3 360 18. Keene J, Li X. Age and gender differences in health service utilization. *J Public Health* 2005;27:74-9.  
4  
5 361 19. Alspach JG. Is there gender bias in critical care? *Crit Care Nurse* 2012;32:8-14.  
6  
7 362 20. Bertakis KD. The influence of gender on the doctor-patient interaction. *Patient Educ Couns*  
8 363 2009;76:356-60.  
9  
10 364 21. National Institute for Health and Care Excellence. *British National Formulary: Antibacterial drugs*.  
11 365 London: National Institute for Health and Care Excellence, 2017.  
12  
13 366 22. Public Health England. *Influenza: the green book, chapter 19*. London: Public Health England, 2015.  
14  
15 367 23. Blak BT, Thompson M, Dattani H *et al*. Generalisability of The Health Improvement Network (THIN)  
16 368 database: demographics, chronic disease prevalence and mortality rates. *Inform Prim Care*  
17 369 2011;19:251-5.  
18  
19 370 24. Gulliford M, Latinovic R, Charlton J *et al*. Selective decrease in consultations and antibiotic prescribing  
20 371 for acute respiratory tract infections in UK primary care up to 2006. *J Public Health* 2009;31:512-20.  
21  
22 372 25. Briscoe ME. Why do people go to the doctor? Sex differences in the correlates of GP consultation. *Soc*  
23 373 *Sci Med* 1987;25:507-13.  
24  
25 374 26. Banks I. No man's land: men, illness and the NHS. *BMJ* 2001;323:1058-60.  
26  
27 375 27. Cals J, Hopstaken R. Lower respiratory infections: treating patients or diagnoses? *J Fam Pract*  
28 376 2006;55:545-6.  
29  
30 377 28. Jakobsen KA, Melbye H, Kelly MJ *et al*. Influence of CRP testing and clinical findings on antibiotic  
31 378 prescribing in adults presenting with acute cough in primary care. *Scand J Prim Health Care*  
32 379 2010;28:229-36.  
33  
34 380 29. Pouwels KB, Dolk FCK, Smith DRM *et al*. Antibiotics in English primary care III: actual versus 'ideal'  
35 381 antibiotic prescribing for common conditions in primary care. *J Antimicrob Chemother*. Submitted.  
36  
37 382 30. Bagger K, Nielsen AB, Siersma V *et al*. Inappropriate antibiotic prescribing and demand for antibiotics  
38 383 in patients with upper respiratory tract infections is hardly different in female versus male patients as  
39 384 seen in primary care. *Eur J Gen Pract* 2015;21:118-23.  
40  
41  
42  
43  
44  
45  
46  
47  
48  
49  
50  
51  
52  
53  
54  
55  
56  
57  
58  
59  
60

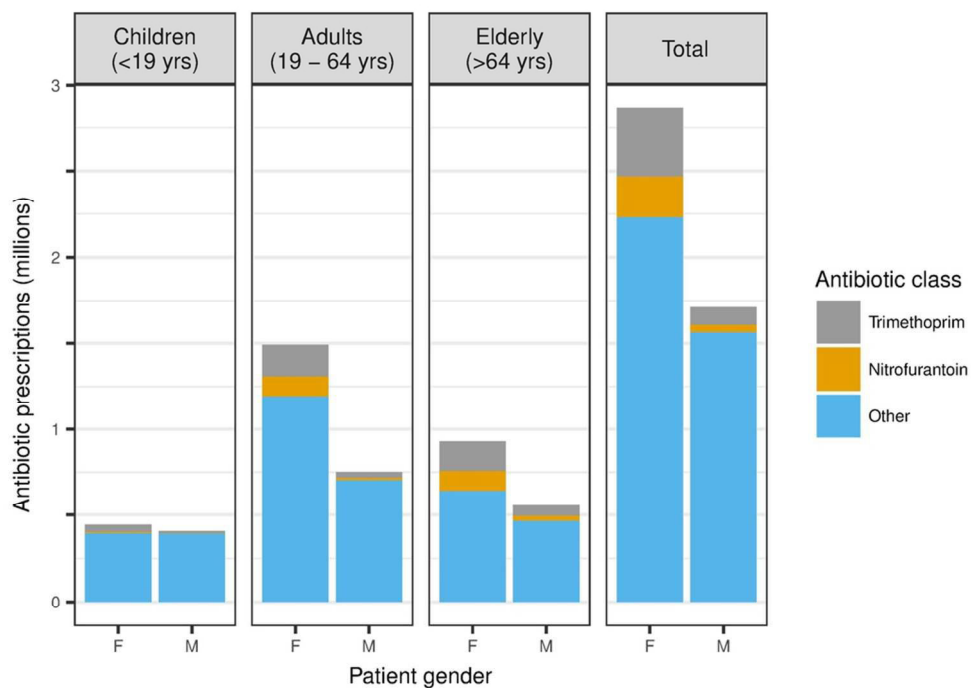

Figure 1. All systemic antibiotic prescriptions recorded in THIN between 2013 and 2015, stratified by gender and age group. Antibiotics used to treat UTI (trimethoprim and nitrofurantoin) are identified separately from all other antibiotics.

89x63mm (300 x 300 DPI)

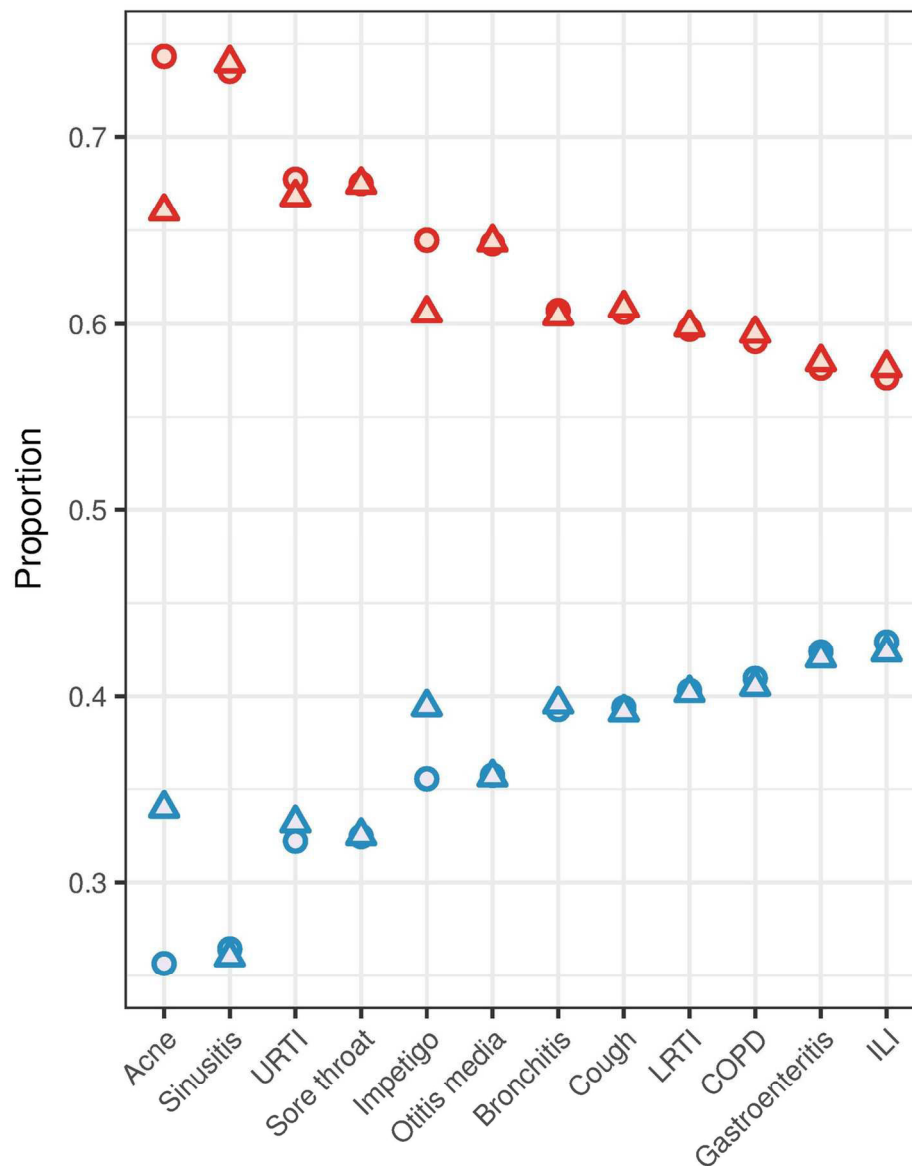

Figure 2. For common conditions in general practice, the proportions all consultations (circles) and antibiotic prescriptions (triangles) attributed to women (red) and men (blue). Consultations and prescriptions include all adult patients (aged 19-64) without comorbidity consulting at their primary registered practice. Conditions are ordered by consultation proportion.

120x151mm (300 x 300 DPI)

### Online supplementary appendix

**Table S1.** Primary care consultations and antibiotic prescribing proportions per consultation in adult men and women (aged 19 – 64 years) with and without comorbidities for 12 different conditions. Consultations from all practices in THIN are included, regardless of whether or not patients were registered there.

|                                  | Number of consultations (% of total) |               | Ratio of female:male consultation | Proportion of patients receiving prescription when consulting (95% CI) |                 | Relative risk of receiving antibiotic prescription when consulting as female (95% CI) |
|----------------------------------|--------------------------------------|---------------|-----------------------------------|------------------------------------------------------------------------|-----------------|---------------------------------------------------------------------------------------|
|                                  | Women                                | Men           |                                   | Women                                                                  | Men             |                                                                                       |
| Acne                             | 46,041 (74%)                         | 16,456 (26%)  | 2.80                              | 41% (40% – 41%)                                                        | 60% (59% – 61%) | 0.67 (0.67 – 0.69) (p<0.001)                                                          |
| Acne with comorbidity            | 3,938 (66%)                          | 1,993 (34%)   | 1.98                              | 42% (40% – 44%)                                                        | 55% (53% – 58%) | 0.76 (0.72 – 0.80) (p<0.001)                                                          |
| Bronchitis                       | 12,318 (61%)                         | 7,977 (39%)   | 1.54                              | 83% (82% – 84%)                                                        | 84% (83% – 85%) | 0.99 (0.98 – 1.00) (p=0.09)                                                           |
| Bronchitis with comorbidity      | 4,916 (59%)                          | 3,375 (41%)   | 1.46                              | 87% (86% – 88%)                                                        | 89% (88% – 90%) | 0.98 (0.96 – 1.00) (p=0.01)                                                           |
| COPD                             | 5,263 (59%)                          | 3,688 (41%)   | 1.43                              | 71% (70% – 73%)                                                        | 69% (67% – 71%) | 1.03 (1.00 – 1.06) (p=0.04)                                                           |
| COPD with non-RTI comorbidity    | 2,050 (54%)                          | 1,718 (46%)   | 1.19                              | 70% (67% – 72%)                                                        | 67% (64% – 70%) | 1.04 (1.00 – 1.09) (p=0.08)                                                           |
| Cough                            | 255,587 (60%)                        | 166,899 (40%) | 1.53                              | 49% (49% – 50%)                                                        | 49% (49% – 49%) | 1.01 (1.00 – 1.02) (p<0.001)                                                          |
| Cough with comorbidity           | 104,317 (59%)                        | 71,401 (41%)  | 1.46                              | 58% (58% – 58%)                                                        | 56% (56% – 57%) | 1.03 (1.02 – 1.04) (p<0.001)                                                          |
| Gastroenteritis                  | 70,835 (57%)                         | 52,796 (43%)  | 1.34                              | 6% (6% – 6%)                                                           | 6% (6% – 6%)    | 0.98 (0.93 – 1.02) (p=0.32)                                                           |
| Gastroenteritis with comorbidity | 19,636 (56%)                         | 15,118 (44%)  | 1.30                              | 7% (7% – 7%)                                                           | 8% (7% – 8%)    | 0.91 (0.85 – 0.99) (p=0.02)                                                           |
| ILI                              | 17,050 (58%)                         | 12,546 (42%)  | 1.36                              | 20% (19% – 20%)                                                        | 20% (19% – 20%) | 1.01 (0.96 – 1.05) (p=0.83)                                                           |
| ILI with comorbidity             | 3,034 (56%)                          | 2,336 (44%)   | 1.30                              | 26% (24% – 27%)                                                        | 28% (26% – 30%) | 0.93 (0.85 – 1.01) (p=0.09)                                                           |

|                                     |                  |                  |      |                    |                    |                               |
|-------------------------------------|------------------|------------------|------|--------------------|--------------------|-------------------------------|
| Impetigo                            | 8,707<br>(64%)   | 4,803<br>(36%)   | 1.81 | 52% (51% –<br>53%) | 61% (59% –<br>62%) | 0.85 (0.83 – 0.88) (p<0.001)  |
| Impetigo<br>with<br>comorbidity     | 1,686<br>(65%)   | 925<br>(35%)     | 1.82 | 51% (49% –<br>54%) | 61% (58% –<br>65%) | 0.84 (0.78 – 0.90) (p<0.001)  |
| LRTI                                | 89,644<br>(59%)  | 61,550<br>(41%)  | 1.46 | 88% (88% –<br>89%) | 87% (87% –<br>87%) | 1.01 (1.01 – 1.02) (p<0.001)  |
| LRTI with<br>comorbidity            | 57,609<br>(59%)  | 39,687<br>(41%)  | 1.45 | 88% (87% –<br>88%) | 86% (85% –<br>86%) | 1.02 (1.02 – 1.03) (p<0.001)  |
| Otitis media                        | 19,440<br>(64%)  | 10,985<br>(36%)  | 1.77 | 82% (81% –<br>82%) | 81% (80% –<br>82%) | 1.01 (1.00 – 1.03) (p = 0.05) |
| Otitis media<br>with<br>comorbidity | 3,935<br>(64%)   | 2,246<br>(36%)   | 1.75 | 83% (82% –<br>84%) | 82% (80% –<br>83%) | 1.02 (0.99 – 1.04) (p=0.13)   |
| Sinusitis                           | 74,863<br>(73%)  | 27,339<br>(27%)  | 2.74 | 87% (87% –<br>88%) | 86% (85% –<br>86%) | 1.02 (1.02 – 1.03) (p<0.001)  |
| Sinusitis<br>with<br>comorbidity    | 18,475<br>(73%)  | 6,865<br>(27%)   | 2.69 | 90% (89% –<br>90%) | 88% (87% –<br>89%) | 1.02 (1.01 – 1.03) (p<0.001)  |
| Sore throat                         | 224,537<br>(67%) | 109,975<br>(33%) | 2.04 | 57% (56% –<br>57%) | 57% (57% –<br>57%) | 0.99 (0.99 – 1.00) (p=0.03)   |
| Sore throat<br>with<br>comorbidity  | 37,446<br>(66%)  | 18,973<br>(34%)  | 1.97 | 53% (53% –<br>54%) | 50% (50% –<br>51%) | 1.06 (1.04 – 1.08) (p<0.001)  |
| URTI                                | 148,959<br>(68%) | 71,244<br>(32%)  | 2.09 | 35% (34% –<br>35%) | 36% (36% –<br>37%) | 0.96 (0.95 – 0.97) (p<0.001)  |
| URTI with<br>comorbidity            | 35,450<br>(64%)  | 19,630<br>(36%)  | 1.81 | 45% (45% –<br>46%) | 46% (45% –<br>47%) | 0.99 (0.97 – 1.01) (p=0.46)   |

**Table S2.** The relative risk of receiving an antibiotic prescription when consulting with comorbidity. All adult patients consulting at their primary registered practice are included.

|      | Relative Risk (95% Confidence Interval) (p-value) |                              |
|------|---------------------------------------------------|------------------------------|
|      | Women                                             | Men                          |
| Acne | 0.99 (0.94 – 1.05) (p=0.80)                       | 0.91 (0.87 – 0.97) (p<0.001) |

|                                    |                              |                              |
|------------------------------------|------------------------------|------------------------------|
| Bronchitis                         | 1.05 (1.03 – 1.06) (p<0.001) | 1.06 (1.04 – 1.08) (p<0.001) |
| COPD (non-respiratory comorbidity) | 1.02 (0.98 – 1.05) (p=0.32)  | 0.98 (0.94 – 1.03) (p=0.42)  |
| Cough                              | 1.19 (1.18 – 1.20) (p<0.001) | 1.17 (1.16 – 1.18) (p<0.001) |
| Gastroenteritis                    | 1.27 (1.18 – 1.40) (p<0.001) | 1.24 (1.14 – 1.35) (p<0.001) |
| ILI                                | 1.29 (1.18 – 1.40) (p<0.001) | 1.51 (1.38 – 1.65) (p<0.001) |
| Impetigo                           | 1.04 (0.98 – 1.10) (p=0.24)  | 1.02 (0.95 – 1.09) (p=0.68)  |
| LRTI                               | 0.99 (0.99 – 1.00) (p=0.002) | 0.99 (0.98 – 0.99) (p<0.001) |
| Otitis media                       | 1.01 (0.99 – 1.03) (p=0.18)  | 1.00 (0.98 – 1.03) (p=0.76)  |
| Sinusitis                          | 1.02 (1.02 – 1.03) (p<0.001) | 1.03 (1.02 – 1.04) (p<0.001) |
| Sore throat                        | 0.94 (0.93 – 0.95) (p<0.001) | 0.88 (0.87 – 0.90) (p<0.001) |
| URTI                               | 1.32 (1.30 – 1.35) (p<0.001) | 1.27 (1.24 – 1.30) (p<0.001) |

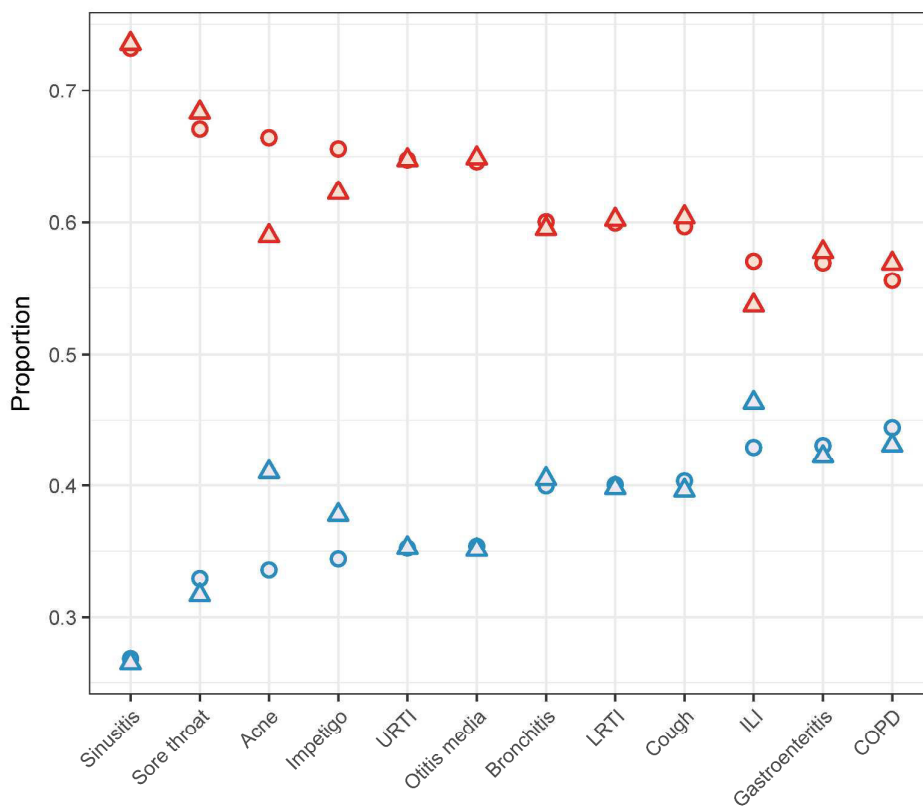



Figure S1. For common conditions in general practice, the proportions of all consultations (circles) and prescriptions (triangles) attributed to women (red) and men (blue). Consultations and prescriptions include all adult patients (aged 19-64) with comorbidity who consulted at their primary registered practice. Conditions are ordered by consultation proportion.

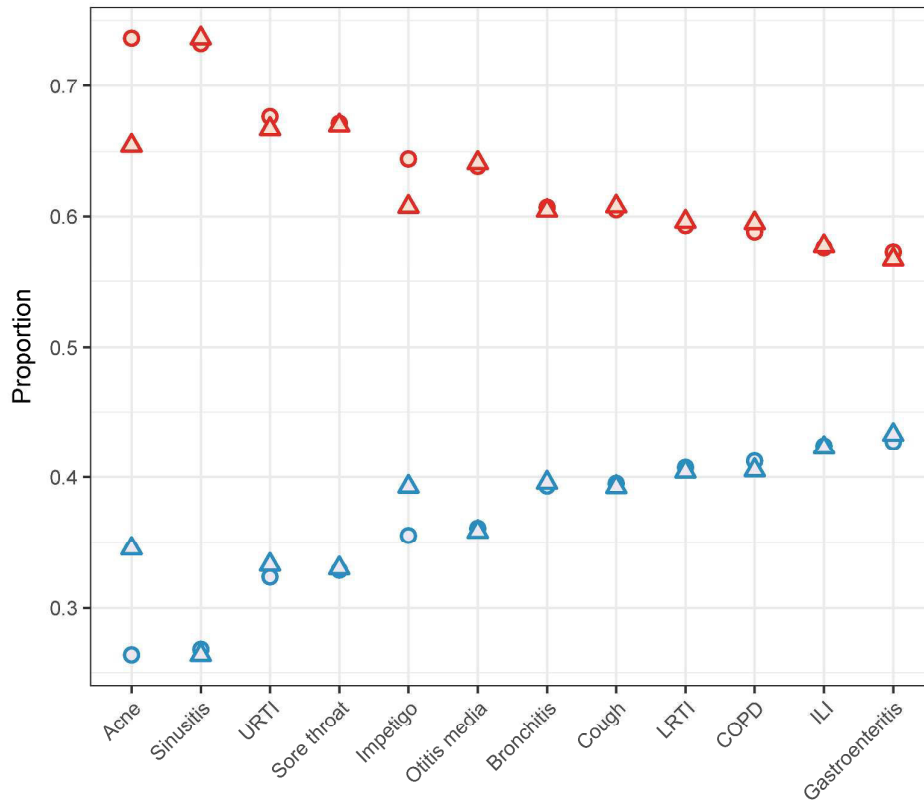

Figure S2. For common conditions in general practice, the proportions of all consultations (circles) and prescriptions (triangles) attributed to women (red) and men (blue). Consultations and prescriptions include all adult patients (aged 19-64) without comorbidity, including those who consulted outside their primary registered practice. Conditions are ordered by consultation proportion.

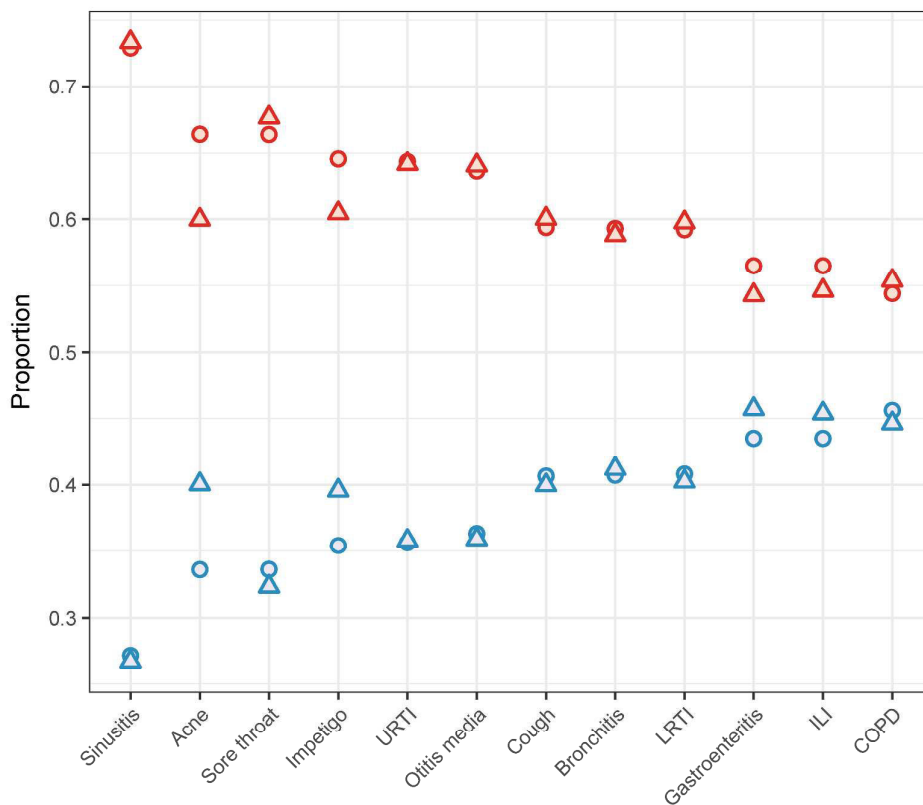

Figure S3. For common conditions in general practice, the proportions of all consultations (circles) and prescriptions (triangles) attributed to women (red) and men (blue). Consultations and prescriptions include all adult patients (aged 19-64) with comorbidity, including those who consulted outside their primary registered practice. Conditions are ordered by consultation proportion.

STROBE Statement—Checklist of items that should be included in reports of *cross-sectional studies*

|                              | Item No | Recommendation                                                                                                                                                                                                                                                                                                                                                                |
|------------------------------|---------|-------------------------------------------------------------------------------------------------------------------------------------------------------------------------------------------------------------------------------------------------------------------------------------------------------------------------------------------------------------------------------|
| <b>Title and abstract</b>    | 1       | (a) Indicate the study's design with a commonly used term in the title or the abstract<br><b>Provided in title 'cross-sectional analysis' and further detail in abstract</b><br>(b) Provide in the abstract an informative and balanced summary of what was done and what was found<br><b>Provided</b>                                                                        |
| <b>Introduction</b>          |         |                                                                                                                                                                                                                                                                                                                                                                               |
| Background/rationale         | 2       | Explain the scientific background and rationale for the investigation being reported<br><b>Background provided, including studies in English primary care and broader meta-analyses of gender bias in prescribing</b>                                                                                                                                                         |
| Objectives                   | 3       | State specific objectives, including any prespecified hypotheses<br><b>Objectives and four potential causes of the gender gap stated</b>                                                                                                                                                                                                                                      |
| <b>Methods</b>               |         |                                                                                                                                                                                                                                                                                                                                                                               |
| Study design                 | 4       | Present key elements of study design early in the paper<br><b>Throughout methods</b>                                                                                                                                                                                                                                                                                          |
| Setting                      | 5       | Describe the setting, locations, and relevant dates, including periods of recruitment, exposure, follow-up, and data collection<br><b>Methods paragraph 1.</b>                                                                                                                                                                                                                |
| Participants                 | 6       | (a) Give the eligibility criteria, and the sources and methods of selection of participants<br><b>Methods paragraph 1.</b>                                                                                                                                                                                                                                                    |
| Variables                    | 7       | Clearly define all outcomes, exposures, predictors, potential confounders, and effect modifiers. Give diagnostic criteria, if applicable<br><b>Methods paragraphs 3-4</b>                                                                                                                                                                                                     |
| Data sources/<br>measurement | 8*      | For each variable of interest, give sources of data and details of methods of assessment (measurement). Describe comparability of assessment methods if there is more than one group<br><b>Methods paragraph 1</b>                                                                                                                                                            |
| Bias                         | 9       | Describe any efforts to address potential sources of bias<br><b>Throughout methods</b>                                                                                                                                                                                                                                                                                        |
| Study size                   | 10      | Explain how the study size was arrived at<br><b>Implicit: all eligible patients in database were included.</b>                                                                                                                                                                                                                                                                |
| Quantitative variables       | 11      | Explain how quantitative variables were handled in the analyses. If applicable, describe which groupings were chosen and why<br><b>Methods paragraphs 2 - 4</b>                                                                                                                                                                                                               |
| Statistical methods          | 12      | (a) Describe all statistical methods, including those used to control for confounding<br>(b) Describe any methods used to examine subgroups and interactions<br>(c) Explain how missing data were addressed<br>(d) If applicable, describe analytical methods taking account of sampling strategy<br>(e) Describe any sensitivity analyses<br><b>Methods paragraphs 2 - 4</b> |
| <b>Results</b>               |         |                                                                                                                                                                                                                                                                                                                                                                               |
| Participants                 | 13*     | (a) Report numbers of individuals at each stage of study—eg numbers potentially eligible, examined for eligibility, confirmed eligible, included in the study, completing follow-up, and analysed                                                                                                                                                                             |

|                          |     |                                                                                                                                                                                                              |
|--------------------------|-----|--------------------------------------------------------------------------------------------------------------------------------------------------------------------------------------------------------------|
|                          |     | (b) Give reasons for non-participation at each stage                                                                                                                                                         |
|                          |     | (c) Consider use of a flow diagram                                                                                                                                                                           |
|                          |     | <b>Results paragraph 1</b>                                                                                                                                                                                   |
| Descriptive data         | 14* | (a) Give characteristics of study participants (eg demographic, clinical, social) and information on exposures and potential confounders                                                                     |
|                          |     | (b) Indicate number of participants with missing data for each variable of interest                                                                                                                          |
|                          |     | <b>Results paragraph 1</b>                                                                                                                                                                                   |
| Outcome data             | 15* | Report numbers of outcome events or summary measures                                                                                                                                                         |
|                          |     | <b>Table 1</b>                                                                                                                                                                                               |
| Main results             | 16  | (a) Give unadjusted estimates and, if applicable, confounder-adjusted estimates and their precision (eg, 95% confidence interval). Make clear which confounders were adjusted for and why they were included |
|                          |     | (b) Report category boundaries when continuous variables were categorized                                                                                                                                    |
|                          |     | (c) If relevant, consider translating estimates of relative risk into absolute risk for a meaningful time period                                                                                             |
|                          |     | <b>Table 1 and throughout results</b>                                                                                                                                                                        |
| Other analyses           | 17  | Report other analyses done—eg analyses of subgroups and interactions, and sensitivity analyses                                                                                                               |
|                          |     | <b>See figures and supplementary file</b>                                                                                                                                                                    |
| <b>Discussion</b>        |     |                                                                                                                                                                                                              |
| Key results              | 18  | Summarise key results with reference to study objectives                                                                                                                                                     |
|                          |     | <b>Discussion paragraph 1</b>                                                                                                                                                                                |
| Limitations              | 19  | Discuss limitations of the study, taking into account sources of potential bias or imprecision. Discuss both direction and magnitude of any potential bias                                                   |
|                          |     | <b>Discussion paragraphs 2 and 5</b>                                                                                                                                                                         |
| Interpretation           | 20  | Give a cautious overall interpretation of results considering objectives, limitations, multiplicity of analyses, results from similar studies, and other relevant evidence                                   |
|                          |     | <b>Discussion paragraphs 4 and 5</b>                                                                                                                                                                         |
| Generalisability         | 21  | Discuss the generalisability (external validity) of the study results                                                                                                                                        |
|                          |     | <b>Discussion paragraph 2</b>                                                                                                                                                                                |
| <b>Other information</b> |     |                                                                                                                                                                                                              |
| Funding                  | 22  | Give the source of funding and the role of the funders for the present study and, if applicable, for the original study on which the present article is based                                                |
|                          |     | <b>Provided; study funded internally by Public Health England</b>                                                                                                                                            |

\*Give information separately for exposed and unexposed groups.

**Note:** An Explanation and Elaboration article discusses each checklist item and gives methodological background and published examples of transparent reporting. The STROBE checklist is best used in conjunction with this article (freely available on the Web sites of PLoS Medicine at <http://www.plosmedicine.org/>, Annals of Internal Medicine at <http://www.annals.org/>, and Epidemiology at <http://www.epidem.com/>). Information on the STROBE Initiative is available at [www.strobe-statement.org](http://www.strobe-statement.org).

# BMJ Open

## Understanding the gender gap in antibiotic prescribing: a cross-sectional analysis of English primary care

|                                 |                                                                                                                                                                                                                                                                                                                                                                                                                                                                                                                                                                                                                                                                    |
|---------------------------------|--------------------------------------------------------------------------------------------------------------------------------------------------------------------------------------------------------------------------------------------------------------------------------------------------------------------------------------------------------------------------------------------------------------------------------------------------------------------------------------------------------------------------------------------------------------------------------------------------------------------------------------------------------------------|
| Journal:                        | <i>BMJ Open</i>                                                                                                                                                                                                                                                                                                                                                                                                                                                                                                                                                                                                                                                    |
| Manuscript ID                   | bmjopen-2017-020203.R1                                                                                                                                                                                                                                                                                                                                                                                                                                                                                                                                                                                                                                             |
| Article Type:                   | Research                                                                                                                                                                                                                                                                                                                                                                                                                                                                                                                                                                                                                                                           |
| Date Submitted by the Author:   | 05-Jan-2018                                                                                                                                                                                                                                                                                                                                                                                                                                                                                                                                                                                                                                                        |
| Complete List of Authors:       | Smith, David; Public Health England, Modelling and Economics Unit, National Infection Service<br>Dolk, Christiaan; University of Groningen, PharmacoTherapy, - Epidemiology & -Economics, Department of Pharmacy<br>Smieszek, Timo; Public Health England, Modelling and Economics Unit, National Infection Service<br>Robotham, Julie; Public Health England, Modelling and Economics Unit, National Infection Service<br>Pouwels, Koen; Public Health England, Modelling and Economics Unit, National Infection Service; Imperial College School of Public Health, MRC Centre for Outbreak Analysis and Modelling, Department of Infectious Disease Epidemiology |
| <b>Primary Subject Heading</b>: | General practice / Family practice                                                                                                                                                                                                                                                                                                                                                                                                                                                                                                                                                                                                                                 |
| Secondary Subject Heading:      | Health services research, Public health                                                                                                                                                                                                                                                                                                                                                                                                                                                                                                                                                                                                                            |
| Keywords:                       | anti-bacterial agents, prescriptions, electronic health records, antibiotic prescribing, consultation, gender bias                                                                                                                                                                                                                                                                                                                                                                                                                                                                                                                                                 |
|                                 |                                                                                                                                                                                                                                                                                                                                                                                                                                                                                                                                                                                                                                                                    |

SCHOLARONE™  
Manuscripts



1  
2  
3 **1 Understanding the gender gap in antibiotic prescribing: a cross-sectional analysis of**

4  
5 **2 English primary care**

6  
7 3 David RM Smith<sup>1\*†</sup>, F Christiaan K Dolk<sup>1,2\*</sup>, Timo Smieszek<sup>1,3</sup>, Julie V Robotham<sup>1</sup>, Koen B

8  
9 4 Pouwels<sup>1,2,3</sup>

10  
11  
12 5 1. Modelling and Economics Unit, National Infection Service, Public Health England, London,

13  
14 6 United Kingdom.

15  
16 7 2. PharmacoTherapy, -Epidemiology & -Economics, Department of Pharmacy, University of

17  
18 8 Groningen, Groningen, The Netherlands.

19  
20 9 3. MRC Centre for Outbreak Analysis and Modelling, Department of Infectious Disease

21  
22 10 Epidemiology, Imperial College School of Public Health, London, United Kingdom.

23  
24  
25 11 \* contributed equally

26  
27  
28 12 † corresponding author: [davidrobertmundysmith@gmail.com](mailto:davidrobertmundysmith@gmail.com) ; +44 20 8327 6651 ; 61

29  
30 13 Colindale Ave, London UK, NW9 5EQ

31  
32 14 Crown Copyright.

33  
34 15 Word count: 2720

1  
2  
3 16 Abstract  
4

5 17 **Objectives:** To explore causes of the gender gap in antibiotic prescribing, and to determine  
6  
7 18 whether women are more likely than men to receive an antibiotic prescription per  
8  
9 19 consultation.  
10

11  
12 20 **Design:** Cross-sectional analysis of routinely collected electronic medical records from The  
13  
14 21 Health Improvement Network (THIN).  
15

16  
17 22 **Setting:** English primary care.  
18

19 23 **Participants:** Patients who consulted general practices registered with THIN between 2013  
20  
21 24 and 2015.  
22

23 25 **Primary and secondary outcome measures:** Total antibiotic prescribing was measured in  
24  
25 26 children (<19 years), adults (19 – 64) and the elderly (65+). For twelve common conditions,  
26  
27 27 the number of adult consultations was measured, and the relative risk (RR) of being  
28  
29 28 prescribed antibiotics when consulting as female or with comorbidity was estimated.  
30  
31 31

32 29 **Results:** Among 4.57 million antibiotic prescriptions observed in the data, female patients  
33  
34 30 received 67% more prescriptions than males, and 43% more when excluding antibiotics  
35  
36 31 used to treat urinary tract infection (UTI). These gaps were more pronounced in adult  
37  
38 32 women (99% more prescriptions than males; 69% more when excluding UTI) than in  
39  
40 33 children (9%; 0%) or the elderly (67%; 38%). Among adults, women accounted for 64% of  
41  
42 34 consultations (61% among patients with comorbidity), but were not substantially more likely  
43  
44 35 than men to receive an antibiotic prescription when consulting with common conditions  
45  
46 36 such as cough (RR 1.01; CI 1.00 – 1.02), sore throat (RR 1.01, CI 1.00 – 1.01) and lower  
47  
48 37 respiratory tract infection (RR 1.00, CI 1.00 – 1.01). Exceptions were skin conditions: women  
49  
50 38 were less likely to be prescribed antibiotics when consulting with acne (RR 0.67, CI 0.66 –  
51  
52 39 0.69) or impetigo (RR 0.85, CI 0.81 – 0.88).  
53  
54  
55  
56  
57  
58  
59  
60

1  
2  
3 40 **Conclusions:** The gender gap in antibiotic prescribing can largely be explained by  
4  
5 41 consultation behaviour. Although in most cases adult men and women are equally likely to  
6  
7 42 be prescribed an antibiotic when consulting primary care, it is unclear whether or not they  
8  
9 43 are equally indicated for antibiotic therapy.  
10  
11  
12 44

13  
14 45 Strengths and limitations of this study:  
15

- 16 46 • This study is one of the first to explore the underlying causes of the large gap in the  
17  
18 47 number of antibiotics prescribed to men and women in primary care.  
19  
20  
21 48 • Findings are derived from a large, representative sample of primary care patients in  
22  
23 49 England.  
24  
25  
26 50 • Extensive mapping of diagnostic codes to clinical conditions made it possible to  
27  
28 51 analyse prescribing across a range of conditions and to account for comorbidity.  
29  
30  
31 52 • Identification of antibiotics that are used to treat UTI but rarely other conditions in  
32  
33 53 this setting (trimethoprim and nitrofurantoin) allowed for approximation of UTI  
34  
35 54 prescribing despite incomplete diagnostic coding.  
36  
37  
38 55 • The data do not include indicators of antibiotic appropriateness, such as severity of  
39  
40 56 illness, and so the clinical appropriateness of gender differences in prescribing could  
41  
42 57 not be evaluated.  
43  
44  
45  
46  
47  
48  
49  
50  
51  
52  
53  
54  
55  
56  
57



## 58 Introduction

59 Reducing the unnecessary use of antibiotics is as an essential means of mitigating the  
60 emergence of antimicrobial resistance and its associated costs,[1,2] but prescribing  
61 reductions are not without risk. The causes and magnitudes of prescribing vary substantially  
62 between practices and prescribers,[3-5] and sweeping, uncalibrated interventions could  
63 jeopardise some patients while failing to prevent unnecessary prescribing in others. In order  
64 to safely and effectively reduce antibiotic use, it is imperative to understand how and to  
65 whom antibiotics are prescribed.

66  
67 Gender is a key determinant of antibiotic prescribing. A recent meta-analysis across primary  
68 care in nine high-income countries found that females received more antibiotics than males  
69 in all age groups except those >75, with women aged 16 to 54 receiving 36% to 40% more  
70 antibiotics than men of the same age.[6] Similarly, across English and Welsh primary care,  
71 the rate of antibiotic prescribing has been found to be 40% higher in female than in male  
72 patients.[7] Although the latter figure dates from 1996, gender disparities in England have  
73 more recently been observed in out-of-hours and paediatric care, with women and girls  
74 receiving more antibiotic prescriptions than men and boys.[8,9]

75  
76 There are several proposed explanations for this gender gap. First, some infectious diseases  
77 affect men and women differently. In particular, urinary tract infection (UTI) is more  
78 common in adult women than in men and accounts for over 20% of antibiotic prescriptions  
79 in English primary care.[10,11] However, respiratory tract infections (RTIs) account for more  
80 than twice as many prescriptions as UTI,[11] and women are not more susceptible to these  
81 conditions than men,[12-14] although gender differences in comorbidity may underlie some

1  
2  
3 82 variation in prescribing. Second, as in many countries,[15,16] women in the UK consult their  
4  
5 83 general practitioner (GP) more often than men,[17-19] and consultation rate is linked to  
6  
7 84 antibiotic prescribing.[5] Previous studies of relatively small samples of patients with RTI  
8  
9 85 have found that gender differences in consultation are proportionate to differences in  
10  
11 86 prescribing [20,21], but it is unclear whether or not this is true across a greater range of  
12  
13  
14 87 conditions, when taking comorbidity into account, and using a more recent, nationally  
15  
16 88 representative sample of patients. Finally, other social and behavioural factors may also play  
17  
18 89 a role. For example, men and women communicate differently with health professionals,  
19  
20  
21 90 and prescribers may have biases that affect their willingness to prescribe antibiotics during  
22  
23 91 consultations with women versus men.[22,23] Ultimately, it remains unknown to what  
24  
25 92 extent these and other factors combine to explain the gender gap in antibiotic  
26  
27  
28 93 prescribing.[6]

29  
30  
31 94

32  
33 95 Here, gender differences in antibiotic prescribing were analysed using a large,  
34  
35 96 representative sample of primary care patients in England. Antibiotic prescribing in male  
36  
37 97 and female children, adults and the elderly was compared at the population level. The  
38  
39 98 influence of gender on prescribing was assessed by controlling for consultation and  
40  
41 99 comorbidity, and calculating the proportions of adult men and women that received  
42  
43  
44 100 systemic antibiotic prescriptions when presenting to primary care with a suite of common  
45  
46 101 conditions. These prescribing proportions facilitate a deeper understanding of the causes of  
47  
48 102 the gender gap in antibiotic prescribing, and may inform prescribing intervention design.

49  
50  
51 103

52  
53 104 **Methods**

1  
2  
3 105 This study used data from English general practices registered with The Health Improvement  
4  
5 106 Network (THIN), a UK-based primary care electronic medical record database. Practices  
6  
7 107 were included that provided data for at least one full calendar year between January 1,  
8  
9 108 2013 and December 31, 2015; there were 349 such practices in 2013, 285 in 2014 and 191 in  
10  
11 109 2015. Anonymised patient data were extracted from these practices that met acceptable  
12  
13 110 standards for research data collection. All systemic antibiotic prescriptions (antibiotics from  
14  
15 111 British National Formulary chapter 5.1,[24] excluding antituberculosis and antileprosy drugs)  
16  
17 112 recorded in THIN were analysed by patient gender and age. Patient age at the time of  
18  
19 113 consultation was used to classify patients as children (aged 0-18 years), adults (19-64 years)  
20  
21 114 and the elderly (65+ years). Due to a very large sample size, proportions of antibiotics  
22  
23 115 prescribed to male versus female patients are reported without confidence intervals.  
24  
25  
26  
27 116  
28  
29 117 Read codes (the diagnostic codes used in THIN) were analysed to quantify the number of  
30  
31 118 male and female consultations for acute presentations of 12 common conditions that are  
32  
33 119 treated with antibiotics to varying degrees: acne, bronchitis, chronic obstructive pulmonary  
34  
35 120 disease (COPD), cough, gastroenteritis, impetigo, influenza-like illness (ILI), lower respiratory  
36  
37 121 tract infection (LRTI), otitis media, sinusitis, sore throat and upper respiratory tract infection  
38  
39 122 (URTI). A vast number of Read codes are used in THIN, and the methods used to assign  
40  
41 123 specific Read codes to different conditions and to link Read codes to acute antibiotic  
42  
43 124 prescriptions are described elsewhere.[11] The ratio of female to male consultations (F:M)  
44  
45 125 was then calculated to quantify gender differences in consultation for each of these  
46  
47 126 conditions.  
48  
49  
50  
51 127  
52  
53  
54  
55  
56  
57  
58  
59  
60

1  
2  
3 128 In THIN, a large proportion of UTI consultations are poorly coded, particularly in patients  
4  
5 129 consulting for UTI prophylaxis or chronic/recurrent UTI. However, between 2013-2015 in  
6  
7 130 English primary care, the antibiotics used to prevent and treat the vast majority of UTIs –  
8  
9 131 trimethoprim and nitrofurantoin – were rarely used for other conditions.[11, 25]  
10  
11 132 Prescriptions of trimethoprim and nitrofurantoin were thus used as a proxy measure for  
12  
13 133 prescribing for UTI.  
14  
15  
16 134  
17  
18 135 Prescribing proportions were then calculated by dividing the total number of prescriptions  
19  
20 136 for a given condition by the number of consultations for that condition. To account for  
21  
22 137 patients that consulted more than once, robust standard errors were used when calculating  
23  
24 138 prescribing proportions. These data were also used to calculate the relative risk (RR) of  
25  
26 139 being prescribed an antibiotic when consulting as female as opposed to male. In the main  
27  
28 140 analysis, consultations were included if they occurred at a patient's primary registered  
29  
30 141 practice, but in a sensitivity analysis all patient consultations recorded in THIN were  
31  
32 142 included. Patients with comorbidity were analysed separately from otherwise 'healthy'  
33  
34 143 patients (i.e., those without comorbidity) to minimise potential biases in consultation and  
35  
36 144 prescribing due to gender differences in background health status. Further, the RR of being  
37  
38 145 prescribed an antibiotic when consulting with comorbidity was also calculated for each  
39  
40 146 condition and gender. Comorbidities were identified by the Read codes that indicate  
41  
42 147 qualification for the free seasonal influenza vaccination programme: asthma, chronic heart  
43  
44 148 disease, chronic kidney disease, chronic liver disease, chronic neurological disease and  
45  
46 149 immunosuppressive disease.[26] Patients who received at least two prescriptions of  
47  
48 150 systemic or inhaled corticosteroids or immunosuppressive drugs in the 365 days prior to  
49  
50  
51  
52  
53  
54  
55  
56  
57  
58  
59  
60

1  
2  
3 151 their consultation were also included in this group, since these drugs indicate an increased  
4  
5 152 risk of serious complications after (respiratory tract) infections.[26]  
6

7 153  
8

9 154 All data were analysed using STATA 13.1 and R version 3.1.  
10  
11

12 155  
13

## 14 156 **Results**

15  
16 157 Of all antibiotic prescriptions observed in THIN between 2013 and 2015 (n=4,574,363), the  
17  
18 158 majority (62.6%) were in female patients (Figure 1). Adult women received approximately  
19  
20 159 twice (99.0%) as many antibiotic prescriptions as adult men, whereas elderly women and  
21  
22 160 girls received 67.4% and 9.2% more prescriptions, respectively, than elderly men and boys.  
23

24  
25 161 Nitrofurantoin and trimethoprim accounted for 17.1% of all prescriptions, 81.3% of which  
26  
27 162 were prescribed to female patients. The prescribing gender gap narrowed in all age groups  
28  
29 163 when these antibiotics were removed, and became negligible in children (0.3%), but adult  
30  
31 164 and elderly women still received, respectively, 69.2% and 37.7% more antibiotic  
32  
33 165 prescriptions than adult and elderly men.  
34  
35

36 166  
37  
38

39 167 Healthy adult women consulted primary care more than men for all 12 of the conditions  
40  
41 168 included in this study, accounting for 64.3% of all consultations (61.9% among patients with  
42  
43 169 comorbidity). The biggest gender gaps in consultation were in acne (F:M 2.90) and sinusitis  
44  
45 170 (F:M 2.78). However, there was little gender difference in the proportions of healthy adult  
46  
47 171 patients that received antibiotic prescriptions when consulting (Table 1). The greatest gaps  
48  
49 172 were in acne, where 60% of consulting men received systemic antibiotics compared to 41%  
50  
51 173 of women (RR 0.67; CI 0.66 – 0.69), and in impetigo, where, respectively, 62% and 52% of  
52  
53 174 men and women received prescriptions (RR 0.85, CI 0.81 – 0.88). In all other conditions, the  
54  
55  
56  
57

175 difference between the proportions of men and women that received antibiotic  
 176 prescriptions when consulting was  $\leq 2\%$ , although these gaps were statistically significant in  
 177 cough (F>M,  $p=0.02$ ), LRTI (F>M,  $p=0.02$ ), sinusitis (F>M,  $p<0.001$ ) and URTI (M>F,  $p<0.001$ ).  
 178 These results held in a sensitivity analysis when consultations and prescriptions outside of  
 179 patients' primary registered practice were included (see online supplementary appendix).  
 180 Further, with the exception of acne and impetigo, the proportions of all antibiotics  
 181 prescribed to men and women for different conditions were proportionate to the  
 182 proportions of all consultations made by men and women for those conditions (Figure 2).  
 183 Accordingly, the proportions of all antibiotics prescribed to women for each condition  
 184 correlate strongly with the proportions of consultations made by women (Spearman's  
 185  $\rho=0.92$ ;  $p<0.001$ ), but not with the proportions of women that received prescriptions when  
 186 consulting with those conditions (Spearman's  $\rho=0.28$ ,  $p=0.38$ ).

187

188 **Table 1.** Primary care consultations and antibiotic prescribing proportions per consultation  
 189 in adult men and women (aged 19 – 64 years) with and without comorbidity for 12 different  
 190 conditions. Only consultations from patients' primary registered practices are included.

|                                       | Number of consultations (% of total) |               | F:M consultation ratio | Proportion of patients receiving prescription when consulting (95% CI) |                 | Relative risk of receiving antibiotic prescription when consulting as female (95% CI) (p-value) |
|---------------------------------------|--------------------------------------|---------------|------------------------|------------------------------------------------------------------------|-----------------|-------------------------------------------------------------------------------------------------|
|                                       | Women                                | Men           |                        | Women                                                                  | Men             |                                                                                                 |
| Acne                                  | 25,676 (74%)                         | 8,864 (26%)   | 2.90                   | 41% (40% – 41%)                                                        | 60% (59% – 61%) | 0.67 (0.66 – 0.69) ( $p<0.001$ )                                                                |
| Acne with comorbidity                 | 2,344 (66%)                          | 1,185 (34%)   | 1.98                   | 40% (38% – 42%)                                                        | 55% (52% – 58%) | 0.73 (0.68 – 0.78) ( $p<0.001$ )                                                                |
| Bronchitis                            | 7,085 (61%)                          | 4,584 (39%)   | 1.55                   | 83% (83% – 84%)                                                        | 84% (83% – 86%) | 0.99 (0.97 – 1.00) ( $p=0.14$ )                                                                 |
| Bronchitis with comorbidity           | 3,101 (60%)                          | 2,065 (40%)   | 1.50                   | 87% (86% – 89%)                                                        | 89% (88% – 91%) | 0.98 (0.96 – 1.00) ( $p=0.03$ )                                                                 |
| COPD                                  | 3,274 (59%)                          | 2,271 (41%)   | 1.44                   | 76% (74% – 78%)                                                        | 75% (73% – 77%) | 1.02 (0.99 – 1.05) ( $p=0.25$ )                                                                 |
| COPD with non-respiratory comorbidity | 1,287 (56%)                          | 1,029 (44%)   | 1.25                   | 73% (70% – 76%)                                                        | 70% (69% – 72%) | 1.06 (1.01 – 1.11) ( $p=0.02$ )                                                                 |
| Cough                                 | 158,614 (61%)                        | 103,058 (39%) | 1.54                   | 48% (48% – 49%)                                                        | 48% (48% – 48%) | 1.01 (1.00 – 1.02) ( $p=0.02$ )                                                                 |
| Cough with                            | 68,353                               | 46,210        | 1.48                   | 58% (57% – 58%)                                                        | 56% (56% – 56%) | 1.03 (1.02 – 1.04) ( $p<0.001$ )                                                                |

|                                  |                  |                 |      |                 |                 |                              |
|----------------------------------|------------------|-----------------|------|-----------------|-----------------|------------------------------|
| comorbidity                      | (60%)            | (40%)           |      | 58%)            | 57%)            |                              |
| Gastroenteritis                  | 41,870<br>(58%)  | 30,810<br>(42%) | 1.36 | 6% (6% – 6%)    | 6% (6% – 6%)    | 1.01 (0.96 – 1.08) (p=0.65)  |
| Gastroenteritis with comorbidity | 12,184<br>(57%)  | 9,216<br>(43%)  | 1.32 | 8% (7% – 8%)    | 7% (7% – 8%)    | 1.03 (0.94 – 1.14) (p=0.49)  |
| ILI                              | 10,569<br>(57%)  | 7,946<br>(43%)  | 1.33 | 20% (19% – 20%) | 19% (18% – 20%) | 1.02 (0.96 – 1.09) (p=0.47)  |
| ILI with comorbidity             | 1,951<br>(57%)   | 1,468<br>(43%)  | 1.33 | 25% (23% – 27%) | 29% (27% – 31%) | 0.87 (0.78 – 0.97) (p=0.02)  |
| Impetigo                         | 5,272<br>(64%)   | 2,907<br>(36%)  | 1.81 | 52% (51% – 54%) | 62% (60% – 63%) | 0.85 (0.81 – 0.88) (p<0.001) |
| Impetigo with comorbidity        | 1,139<br>(66%)   | 598<br>(34%)    | 1.90 | 54% (51% – 57%) | 63% (58% – 66%) | 0.86 (0.80 – 0.94) (p<0.001) |
| LRTI                             | 52,996<br>(60%)  | 35,777<br>(40%) | 1.48 | 91% (91% – 92%) | 91% (91% – 91%) | 1.00 (1.00 – 1.01) (p=0.02)  |
| LRTI with comorbidity            | 36,693<br>(60%)  | 24,519<br>(40%) | 1.50 | 91% (90% – 91%) | 90% (89% – 90%) | 1.01 (1.01 – 1.02) (p<0.001) |
| Otitis media                     | 11,773<br>(64%)  | 6,545<br>(36%)  | 1.80 | 84% (84% – 85%) | 84% (83% – 85%) | 1.00 (0.99 – 1.02) (p=0.58)  |
| Otitis media with comorbidity    | 2,556<br>(65%)   | 1,400<br>(35%)  | 1.83 | 85% (84% – 87%) | 84% (82% – 86%) | 1.01 (0.98 – 1.04) (p=0.41)  |
| Sinusitis                        | 46,221<br>(74%)  | 16,625<br>(26%) | 2.78 | 88% (88% – 89%) | 86% (86% – 87%) | 1.02 (1.02 – 1.03) (p<0.001) |
| Sinusitis with comorbidity       | 12,013<br>(73%)  | 4,394<br>(27%)  | 2.73 | 90% (90% – 91%) | 89% (88% – 90%) | 1.02 (1.00 – 1.03) (p=0.006) |
| Sore throat                      | 136,117<br>(68%) | 65,531<br>(32%) | 2.08 | 57% (56% – 57%) | 57% (56% – 57%) | 1.00 (0.99 – 1.01) (p=0.67)  |
| Sore throat with comorbidity     | 24,376<br>(67%)  | 11,968<br>(33%) | 2.04 | 53% (52% – 54%) | 50% (49% – 51%) | 1.06 (1.04 – 1.08) (p<0.001) |
| URTI                             | 90,295<br>(68%)  | 42,998<br>(32%) | 2.10 | 34% (34% – 34%) | 36% (35% – 36%) | 0.96 (0.94 – 0.97) (p<0.001) |
| URTI with comorbidity            | 22,995<br>(65%)  | 12,515<br>(35%) | 1.84 | 45% (45% – 46%) | 45% (44% – 46%) | 1.00 (0.98 – 1.02) (p=0.96)  |

191

192

193 These gender differences in prescribing were broadly similar among adults with

194 comorbidity. Women with comorbidity were substantially less likely than men with

195 comorbidity to receive antibiotic prescriptions when consulting with acne (RR 0.73, CI 0.68 –

196 0.78) or impetigo (RR 0.86, CI 0.80 – 0.94) (Table 1), and also ILI (RR 0.87, CI 0.78 – 0.97), but

197 for all other conditions the difference between the proportions of men and women that

198 received prescriptions when consulting was  $\leq 3\%$ . Again, among patients with comorbidity,

1  
2  
3 199 the proportions of antibiotics prescribed to women for each condition correlate strongly  
4  
5 200 with the proportions of consultations made by women (Spearman's  $\rho=0.78$ ;  $p=0.005$ ), but  
6  
7 201 not with the proportion of women that received prescriptions when consulting with those  
8  
9 202 conditions (Spearman's  $\rho=0.41$ ,  $p=0.19$ ).  
10  
11  
12 203  
13  
14 204 Patients with comorbidity were generally more likely than those without comorbidity to  
15  
16 205 receive antibiotic prescriptions when consulting (see online supplementary appendix). In  
17  
18 206 both men and women the greatest of these differences were in URTI, cough and ILI, where  
19  
20 207 the proportion of patients that received antibiotics when consulting was approximately 6-  
21  
22 208 12% higher among patients with comorbidity. Patients with comorbidity were also more  
23  
24 209 likely to receive a prescription when consulting with bronchitis, gastroenteritis and sinusitis.  
25  
26 210 However, among women consulting with sore throat and LRTI, and among men consulting  
27  
28 211 with sore throat, LRTI and acne, the proportions of patients that received antibiotics when  
29  
30 212 consulting was significantly lower among patients with comorbidity than among otherwise  
31  
32 213 healthy patients.  
33  
34  
35  
36  
37  
38  
39  
40

## 41 215 **Discussion**

42 216 This study affirms that there is still a substantial gender gap in antibiotic prescribing in  
43  
44 217 English primary care, and shows that this gap is in large part unexplained by gender  
45  
46 218 differences in UTI and comorbidity. The prescribing gap is most pronounced in adults, with  
47  
48 219 women receiving approximately twice as many antibiotic prescriptions as men, and 70%  
49  
50 220 more when excluding antibiotics used to treat UTI. These differences in prescribing are  
51  
52 221 proximate to differences in health-seeking behaviour, with healthy adult women consulting  
53  
54 222 primary care approximately 80% more than healthy adult men across the 12 conditions  
55  
56  
57  
58  
59  
60



1  
2  
3 223 included in this study. Accordingly, men and women are just as likely to be prescribed  
4  
5 224 antibiotics when consulting with most common RTIs. These findings provide strong support  
6  
7 225 for the hypothesis that higher antibiotic prescribing in adult women is primarily driven by a  
8  
9 226 higher consultation rate.  
10

11  
12 227

13  
14 228 This study has a number of strengths. First, THIN is a robust data source that is  
15  
16 229 representative of the English primary care patient population.[27] Second, the extensive  
17  
18 230 mapping of Read codes to clinical conditions made it possible to analyse prescribing across a  
19  
20 231 range of conditions and to account for comorbidities, which differ between men and  
21  
22 232 women and influence whether or not a practitioner prescribes. Third, since UTI in English  
23  
24 233 primary care was almost always treated with trimethoprim or nitrofurantoin during the  
25  
26 234 years of this study, and since these antibiotics were rarely used to treat other conditions in  
27  
28 235 primary care,[11, 25] it was possible to approximate total prescribing for UTI despite  
29  
30 236 incomplete diagnostic coding. There were also limitations to this work, the largest being  
31  
32 237 that the clinical appropriateness of prescribing could not be determined, and so it was not  
33  
34 238 possible to evaluate whether consulting men and women were differently indicated for  
35  
36 239 antibiotics, and hence whether equal prescribing proportions in RTIs are clinically justified.  
37  
38 240 Further, other patient characteristics that may co-vary with gender and consultation  
39  
40 241 behaviour, such as socioeconomic status, could not be considered. Finally, the quality of  
41  
42 242 diagnostic coding varies within and between practices, which may bias estimates of  
43  
44 243 consultation and prescribing.  
45  
46  
47  
48  
49

50  
51 244

52  
53 245 It is well observed that rates of primary care consultation and antibiotic prescribing are  
54  
55 246 substantially higher in adult women than in adult men,[6-8,17-19] but previous studies have  
56  
57

1  
2  
3 247 been unable to show that the gender gap in antibiotic prescribing can primarily be  
4  
5 248 attributed to consultation, as opposed to other relevant factors such as UTI, comorbidity  
6  
7 249 and other patient and prescriber behaviours. These findings build on two previous studies of  
8  
9 250 antibiotic prescribing in primary care between 1997-2006 and 2007-2008,  
10  
11 251 respectively.[20,21] Both studies found similar male and female prescribing proportions in a  
12  
13 252 selection of RTIs, but were conducted in a limited subset of patients and did not account for  
14  
15 253 comorbidities, non-respiratory conditions, patients consulting outside of their registered  
16  
17 254 practice, or gender differences in gross antibiotic prescribing at the population level.  
18  
19 255  
20  
21 256 Antibiotic prescribing was proportionate to consultation for most conditions, but skin  
22  
23 257 conditions were notable exceptions: men consulted much less with acne and impetigo but  
24  
25 258 were substantially more likely than women to receive an antibiotic prescription when  
26  
27 259 consulting (although acne is unique in that women but not men can be treated with  
28  
29 260 combination oral contraceptives, confounding gender comparisons in antibiotic prescribing).  
30  
31 261 Although women consult more frequently, they are not known to suffer from greater  
32  
33 262 incidence or severity of disease in the conditions included here.[12,13] Studies have also  
34  
35 263 shown that men tend to consult later in the course of their illness and may have a higher  
36  
37 264 threshold to seeking care.[18,28,29] When prescribing is truly reflective of patient need  
38  
39 265 (e.g., as in skin conditions, due to low diagnostic uncertainty), a higher prescribing  
40  
41 266 proportion in men may be expected if, on average, less frequent and/or delayed  
42  
43 267 consultation is coupled with more severe clinical presentation. Yet, for the remaining  
44  
45 268 conditions in this study – predominantly RTIs – prescribing proportions in male and female  
46  
47 269 patients were strikingly similar despite vast differences in consultation. This may be  
48  
49 270 indicative of imprudent prescribing. In non-skin conditions there is often (i) considerable

1  
2  
3 271 diagnostic uncertainty (e.g., difficulty in differentiating acute bronchitis and pneumonia in  
4  
5 272 primary care) and (ii) uncertainty around subjective, insensitive or unspecific clinical severity  
6  
7 273 markers (e.g., reliance on patient symptom reporting and other clinical features that poorly  
8  
9 274 predict benefit from antibiotic treatment).[30,31] Faced by these uncertainties, GPs may  
10  
11 275 prescribe antibiotics cautiously – and imprudently – to a large proportion of patients  
12  
13 276 with RTI, regardless of disease severity, resulting in high prescribing proportions in all  
14  
15 277 patients.  
16  
17  
18

19 278

20  
21 279 Although imprudent prescribing has been the target of numerous antimicrobial stewardship  
22  
23 280 interventions, it remains obstinate in English primary care,[32] and the combination of high  
24  
25 281 consultation rates among female patients and overly cautious antibiotic prescribing  
26  
27 282 behaviour among GPs could result in a disproportionate share of inappropriate (i.e.,  
28  
29 283 unnecessary) antibiotic prescriptions in women. However, previous studies of gender  
30  
31 284 differences in inappropriate antibiotic prescribing have found mixed results,[21,33] and it  
32  
33 285 remains to be shown whether men and women in UK primary care differ in their objective  
34  
35 286 clinical need for antibiotics when consulting with RTIs and other common conditions. Yet,  
36  
37 287 regardless of whether or not women are more likely to receive an inappropriate prescription  
38  
39 288 per consultation, it is likely that a higher level of antibiotic prescribing in women is  
40  
41 289 accompanied by a greater total number of inappropriate prescriptions.  
42  
43  
44  
45

46 290

### 47 291 *Conclusions*

48  
49 292 This study reaffirms known gender gaps in health-seeking behaviour and antibiotic  
50  
51 293 prescribing, and shows that, with exceptions, adult men and women in English general  
52  
53 294 practice are equally likely to receive an antibiotic prescription when seeking care for  
54  
55  
56  
57

1  
2  
3 295 common conditions, and that gender differences in the number of antibiotics prescribed are  
4  
5 296 largely driven by differences in consultation behaviour. Equal prescribing proportions may  
6  
7 297 seem to indicate relative parity in how men and women are treated when they consult, but  
8  
9 298 women consult vastly more than men yet have not been shown to suffer from more  
10  
11 299 frequent or severe infection in the conditions included in this study. It is thus plausible that  
12  
13 300 a higher rate of consultation in women is coupled with a milder average clinical  
14  
15 301 presentation, but that overly precautionary GPs prescribe even when antibiotics are not  
16  
17 302 clinically necessary, resulting in high rates of prescribing in all patients. Given the urgent  
18  
19 303 need to reduce unnecessary antibiotic prescribing, it is crucial to more deeply understand  
20  
21 304 how and to whom antibiotics are overprescribed. To this end, future work should further  
22  
23 305 investigate gender differences in the clinical (in)appropriateness of antibiotic prescribing in  
24  
25 306 primary care.  
26  
27  
28  
29  
30  
31

### 308 Figure captions

309 **Figure 1.** All systemic antibiotic prescriptions recorded in THIN between 2013 and 2015,  
310 stratified by gender and age group. Antibiotics used to treat UTI (trimethoprim and  
311 nitrofurantoin) are identified separately from all other antibiotics.

312 **Figure 2.** For common conditions in general practice, the proportions all consultations  
313 (circles) and antibiotic prescriptions (triangles) attributed to women (red) and men (blue).  
314 Consultations and prescriptions include all adult patients (aged 19-64) without comorbidity  
315 consulting at their primary registered practice. Conditions are ordered by consultation  
316 proportion.

### 318 Additional information

319 **Contributors:** DS and KP conceived and designed the study. KP extracted the data from The  
320 Health Improvement Network database. CD and KP conducted the analyses. DS, JR, KP and  
321 TS carried out interpretation of the data. DS drafted the manuscript. CD, JR, KP and TS

1  
2  
3 322 critically revised the manuscript for important intellectual content. All authors approved the  
4  
5 323 final version prior to submission.

6  
7 324 **Funding:** This work was funded internally by Public Health England.

8  
9 325 **Competing interests:** None.

10  
11 326 **Ethics approval:** This study received approval from THIN's Scientific Review Committee  
12  
13  
14 327 (reference number 16THIN-071-A2).

15  
16 328 **Data sharing statement:** This analysis is based on a large sample from The Health  
17  
18  
19 329 Improvement Network, provided by IMS Health. The authors' license for using these data  
20  
21 330 precludes the sharing of raw data with third parties.

22  
23  
24 331  
25  
26  
27  
28  
29  
30  
31  
32  
33  
34  
35  
36  
37  
38  
39  
40  
41  
42  
43  
44  
45  
46  
47  
48  
49  
50  
51  
52  
53  
54  
55  
56  
57  
58  
59  
60

## 332 References:

- 333 1. Chief Medical Officer. *UK Five Year Antimicrobial Resistance Strategy 2013 to 2018*. London:  
334 Department of Health, 2013.
- 335 2. Shallcross LJ, Davies SC. Antibiotic overuse: a key driver of antimicrobial resistance. *Br J Gen Pract*  
336 2014;64:604-5.
- 337 3. Butler CC, Rollnick S, Pill R *et al*. Understanding the culture of prescribing: qualitative study of general  
338 practitioners' and patients' perceptions of antibiotics for sore throats. *BMJ* 1998;317:637.
- 339 4. Cadieux G, Tamblyn R, Dauphinee D *et al*. Predictors of inappropriate antibiotic prescribing among  
340 primary care physicians. *CMAJ* 2007;177:877-83.
- 341 5. Pouwels KB, Dolk FCK, Smith DRM *et al*. Explaining variation in antibiotic prescribing between general  
342 practices in the UK. *J Antimicrob Chemother*. In press. doi:10.1093/jac/dkx501
- 343 6. Schröder W, Sommer H, Primrose Gladstone B *et al*. Gender differences in antibiotic prescribing in the  
344 community: a systematic review and meta-analysis. *J Antimicrob Chemother* 2016;71:1800-6.
- 345 7. Majeed A, Moser K. Age- and sex-specific antibiotic prescribing patterns in general practice in England  
346 and Wales in 1996. *Br J Gen Pract* 1999;49:735-6.
- 347 8. Hayward GN, Fisher RE, Spence GT *et al*. Increase in antibiotic prescriptions in out-of-hours primary  
348 care in contrast to in-hours primary care prescriptions: service evaluation in a population of 600 000  
349 patients. *J Antimicrob Chemother* 2016;71:2612-9.
- 350 9. Schneider-Lindner V, Quach C, Hanley JA *et al*. Secular trends of antibacterial prescribing in UK  
351 paediatric primary care. *J Antimicrob Chemother* 2011;66:424-33.
- 352 10. Foxman B. The epidemiology of urinary tract infection. *Nat Rev Urol* 2010;7:653-60.
- 353 11. Dolk FCK, Pouwels KB, Smith DRM *et al*. Antibiotics in primary care in England: which antibiotics are  
354 prescribed and for which conditions? *J Antimicrob Chemother*. In press. doi:10.1093/jac/dkx504
- 355 12. Gutiérrez F, Masiá M, Mirete C *et al*. The influence of age and gender on the population-based  
356 incidence of community-acquired pneumonia caused by different microbial pathogens. *J Infect*  
357 2006;53:166-74.
- 358 13. Falagas M, Mourtzoukou EG, Vardakas KZ. Sex differences in the incidence and severity of respiratory  
359 tract infections. *Respir Med* 2007;101:1845-63.
- 360 14. Sue K. The science behind "man flu". *BMJ* 2017;359:j5560.
- 361 15. Pinkhasov RM, Wong J, Kashanian J *et al*. Are men shortchanged on health? Perspective on health  
362 care utilization and health risk behavior in men and women in the United States. *Int J Clin Pract*  
363 2010;64:475-87.
- 364 16. Vos HM, Schellevis FG, van den Berkmoortel H *et al*. Does prevention of risk-behaviour in primary care  
365 require a gender-specific approach? A cross-sectional study. *Fam Pract* 2013;30:179-84.
- 366 17. Wang Y, Hunt K, Nazareth I *et al*. Do men consult less than women? An analysis of routinely collected  
367 UK general practice data. *BMJ Open* 2013;3:e003320.

- 1  
2  
3 368 18. Galdas PM, Cheater F, Marshall P. Men and health help-seeking behaviour: literature review. *J Adv*  
4 369 *Nurs* 2005;49:616-23.
- 5  
6 370 19. Keene J, Li X. Age and gender differences in health service utilization. *J Public Health* 2005;27:74-9.
- 7  
8 371 20. Gulliford M, Latinovic R, Charlton J *et al*. Selective decrease in consultations and antibiotic prescribing  
9 372 for acute respiratory tract infections in UK primary care up to 2006. *J Public Health* 2009;31:512-20.
- 10  
11 373 21. Bagger K, Nielsen AB, Siersma V *et al*. Inappropriate antibiotic prescribing and demand for antibiotics  
12 374 in patients with upper respiratory tract infections is hardly different in female versus male patients as  
13 375 seen in primary care. *Eur J Gen Pract* 2015;21:118-23.
- 14  
15 376 22. Alspach JG. Is there gender bias in critical care? *Crit Care Nurse* 2012;32:8-14.
- 16  
17 377 23. Bertakis KD. The influence of gender on the doctor-patient interaction. *Patient Educ Couns*  
18 378 2009;76:356-60.
- 19  
20 379 24. National Institute for Health and Care Excellence. *British National Formulary: Antibacterial drugs*.  
21 380 London: National Institute for Health and Care Excellence, 2017.
- 22  
23 381 25. Rosello A, Pouwels KB, Domenech de Cellès M *et al*. Seasonality of urinary tract infections in the  
24 382 United Kingdom in different age groups: longitudinal analysis of The Health Improvement Network  
25 383 (THIN). *Epidemiol Infect*. Published online: 23 November 2017. doi:10.1017/S095026881700259X
- 26  
27 384 26. Public Health England. *Influenza: the green book, chapter 19*. London: Public Health England, 2015.
- 28  
29 385 27. Blak BT, Thompson M, Dattani H *et al*. Generalisability of The Health Improvement Network (THIN)  
30 386 database: demographics, chronic disease prevalence and mortality rates. *Inform Prim Care*  
31 387 2011;19:251-5.
- 32  
33 388 28. Briscoe ME. Why do people go to the doctor? Sex differences in the correlates of GP consultation. *Soc*  
34 389 *Sci Med* 1987;25:507-13.
- 35  
36 390 29. Banks I. No man's land: men, illness and the NHS. *BMJ* 2001;323:1058-60.
- 37  
38 391 30. Cals J, Hopstaken R. Lower respiratory infections: treating patients or diagnoses? *J Fam Pract*  
39 392 2006;55:545-6.
- 40  
41 393 31. Jakobsen KA, Melbye H, Kelly MJ *et al*. Influence of CRP testing and clinical findings on antibiotic  
42 394 prescribing in adults presenting with acute cough in primary care. *Scand J Prim Health Care*  
43 395 2010;28:229-36.
- 44  
45 396 32. Smieszek T, Pouwels KB, Dolk FCK *et al*. Potential for reducing inappropriate antibiotic prescribing in  
46 397 English primary care. *J Antimicrob Chemother*. In press. doi:10/1093/jac/dkx500
- 47  
48 398 33. Barlam TF, Morgan JR, Wetzler LM *et al*. Antibiotics for respiratory tract infections: a comparison of  
49 399 prescribing in an outpatient setting. *Infect Control Hosp Epidemiol* 2015;36:153-9.
- 50  
51  
52  
53  
54  
55  
56  
57  
58  
59  
60



Figure 1. All systemic antibiotic prescriptions recorded in THIN between 2013 and 2015, stratified by gender and age group. Antibiotics used to treat UTI (trimethoprim and nitrofurantoin) are identified separately from all other antibiotics.

89x63mm (300 x 300 DPI)



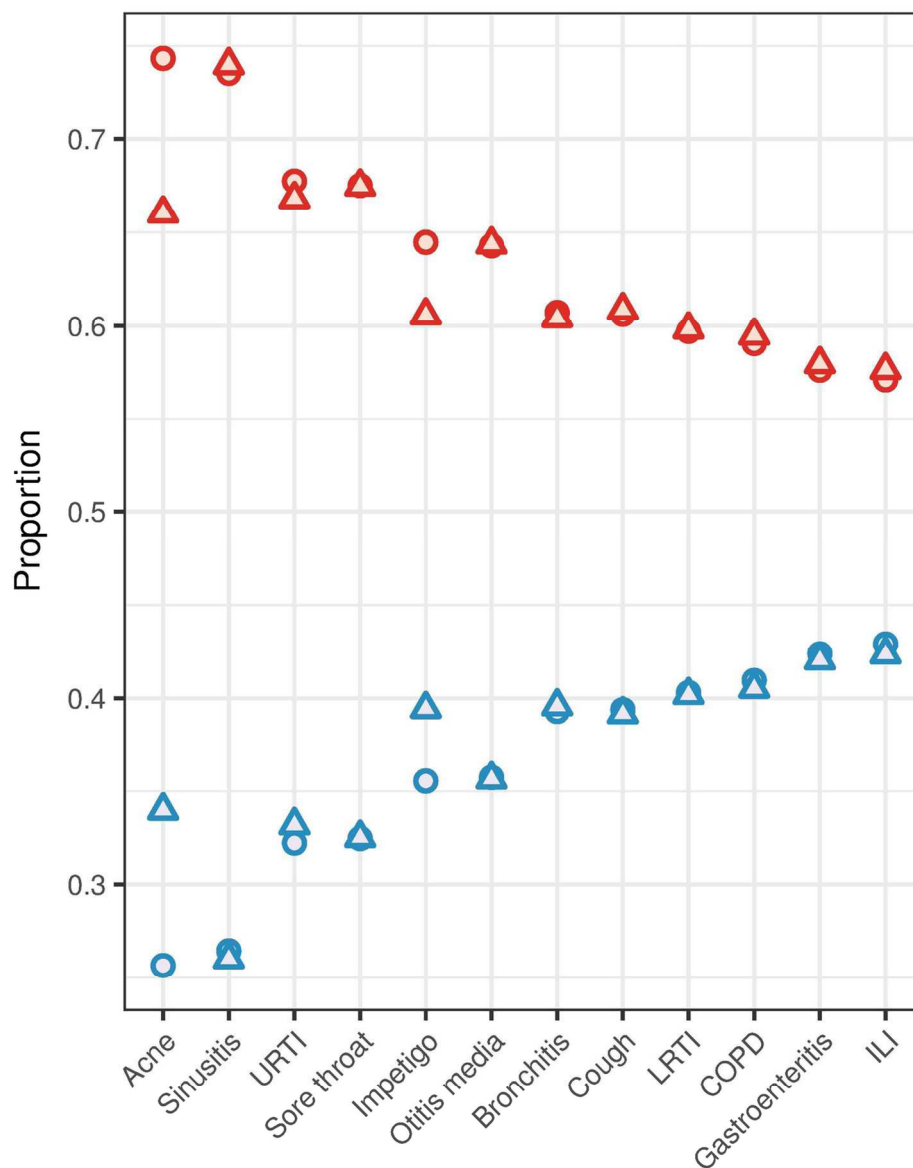

Figure 2. For common conditions in general practice, the proportions all consultations (circles) and antibiotic prescriptions (triangles) attributed to women (red) and men (blue). Consultations and prescriptions include all adult patients (aged 19-64) without comorbidity consulting at their primary registered practice. Conditions are ordered by consultation proportion.

120x151mm (300 x 300 DPI)

## Understanding the gender gap in antibiotic prescribing: a cross-sectional analysis of English primary care

Smith DRM, Dolk FCK, Smieszek T, Robotham JV, Pouwels KB

### Online supplementary appendix

**Table S1.** Primary care consultations and antibiotic prescribing proportions per consultation in adult men and women (aged 19 – 64 years) with and without comorbidities for 12 different conditions. Consultations from all practices in THIN are included, regardless of whether or not patients were registered there.

|                               | Number of consultations (% of total) |               | Ratio of female:male consultation | Proportion of patients receiving prescription when consulting (95% CI) |                 | Relative risk of receiving antibiotic prescription when consulting as female (95% CI) (p-value) |
|-------------------------------|--------------------------------------|---------------|-----------------------------------|------------------------------------------------------------------------|-----------------|-------------------------------------------------------------------------------------------------|
|                               | Women                                | Men           |                                   | Women                                                                  | Men             |                                                                                                 |
| Acne                          | 46,041 (74%)                         | 16,456 (26%)  | 2.80                              | 41% (40% – 41%)                                                        | 60% (59% – 61%) | 0.67 (0.67 – 0.69) (p<0.001)                                                                    |
| Acne with comorbidity         | 3,938 (66%)                          | 1,993 (34%)   | 1.98                              | 42% (40% – 44%)                                                        | 55% (53% – 58%) | 0.76 (0.72 – 0.80) (p<0.001)                                                                    |
| Bronchitis                    | 12,318 (61%)                         | 7,977 (39%)   | 1.54                              | 83% (82% – 84%)                                                        | 84% (83% – 85%) | 0.99 (0.98 – 1.00) (p=0.09)                                                                     |
| Bronchitis with comorbidity   | 4,916 (59%)                          | 3,375 (41%)   | 1.46                              | 87% (86% – 88%)                                                        | 89% (88% – 90%) | 0.98 (0.96 – 1.00) (p=0.01)                                                                     |
| COPD                          | 5,263 (59%)                          | 3,688 (41%)   | 1.43                              | 71% (70% – 73%)                                                        | 69% (67% – 71%) | 1.03 (1.00 – 1.06) (p=0.04)                                                                     |
| COPD with non-RTI comorbidity | 2,050 (54%)                          | 1,718 (46%)   | 1.19                              | 70% (67% – 72%)                                                        | 67% (64% – 70%) | 1.04 (1.00 – 1.09) (p=0.08)                                                                     |
| Cough                         | 255,587 (60%)                        | 166,899 (40%) | 1.53                              | 49% (49% – 50%)                                                        | 49% (49% – 49%) | 1.01 (1.00 – 1.02) (p<0.001)                                                                    |
| Cough with comorbidity        | 104,317 (59%)                        | 71,401 (41%)  | 1.46                              | 58% (58% – 58%)                                                        | 56% (56% – 57%) | 1.03 (1.02 – 1.04) (p<0.001)                                                                    |
| Gastroenteritis               | 70,835 (57%)                         | 52,796 (43%)  | 1.34                              | 6% (6% – 6%)                                                           | 6% (6% – 6%)    | 0.98 (0.93 – 1.02) (p=0.32)                                                                     |
| Gastroenteritis with          | 19,636 (56%)                         | 15,118 (44%)  | 1.30                              | 7% (7% – 7%)                                                           | 8% (7% – 8%)    | 0.91 (0.85 – 0.99) (p=0.02)                                                                     |

| comorbidity                         |                  |                  |      |                    |                    |                               |
|-------------------------------------|------------------|------------------|------|--------------------|--------------------|-------------------------------|
| ILI                                 | 17,050<br>(58%)  | 12,546<br>(42%)  | 1.36 | 20% (19% –<br>20%) | 20% (19% –<br>20%) | 1.01 (0.96 – 1.05) (p=0.83)   |
| ILI with<br>comorbidity             | 3,034<br>(56%)   | 2,336<br>(44%)   | 1.30 | 26% (24% –<br>27%) | 28% (26% –<br>30%) | 0.93 (0.85 – 1.01) (p=0.09)   |
| Impetigo                            | 8,707<br>(64%)   | 4,803<br>(36%)   | 1.81 | 52% (51% –<br>53%) | 61% (59% –<br>62%) | 0.85 (0.83 – 0.88) (p<0.001)  |
| Impetigo<br>with<br>comorbidity     | 1,686<br>(65%)   | 925<br>(35%)     | 1.82 | 51% (49% –<br>54%) | 61% (58% –<br>65%) | 0.84 (0.78 – 0.90) (p<0.001)  |
| LRTI                                | 89,644<br>(59%)  | 61,550<br>(41%)  | 1.46 | 88% (88% –<br>89%) | 87% (87% –<br>87%) | 1.01 (1.01 – 1.02) (p<0.001)  |
| LRTI with<br>comorbidity            | 57,609<br>(59%)  | 39,687<br>(41%)  | 1.45 | 88% (87% –<br>88%) | 86% (85% –<br>86%) | 1.02 (1.02 – 1.03) (p<0.001)  |
| Otitis media                        | 19,440<br>(64%)  | 10,985<br>(36%)  | 1.77 | 82% (81% –<br>82%) | 81% (80% –<br>82%) | 1.01 (1.00 – 1.03) (p = 0.05) |
| Otitis media<br>with<br>comorbidity | 3,935<br>(64%)   | 2,246<br>(36%)   | 1.75 | 83% (82% –<br>84%) | 82% (80% –<br>83%) | 1.02 (0.99 – 1.04) (p=0.13)   |
| Sinusitis                           | 74,863<br>(73%)  | 27,339<br>(27%)  | 2.74 | 87% (87% –<br>88%) | 86% (85% –<br>86%) | 1.02 (1.02 – 1.03) (p<0.001)  |
| Sinusitis<br>with<br>comorbidity    | 18,475<br>(73%)  | 6,865<br>(27%)   | 2.69 | 90% (89% –<br>90%) | 88% (87% –<br>89%) | 1.02 (1.01 – 1.03) (p<0.001)  |
| Sore throat                         | 224,537<br>(67%) | 109,975<br>(33%) | 2.04 | 57% (56% –<br>57%) | 57% (57% –<br>57%) | 0.99 (0.99 – 1.00) (p=0.03)   |
| Sore throat<br>with<br>comorbidity  | 37,446<br>(66%)  | 18,973<br>(34%)  | 1.97 | 53% (53% –<br>54%) | 50% (50% –<br>51%) | 1.06 (1.04 – 1.08) (p<0.001)  |
| URTI                                | 148,959<br>(68%) | 71,244<br>(32%)  | 2.09 | 35% (34% –<br>35%) | 36% (36% –<br>37%) | 0.96 (0.95 – 0.97) (p<0.001)  |
| URTI with<br>comorbidity            | 35,450<br>(64%)  | 19,630<br>(36%)  | 1.81 | 45% (45% –<br>46%) | 46% (45% –<br>47%) | 0.99 (0.97 – 1.01) (p=0.46)   |

**Table S2.** The relative risk of receiving an antibiotic prescription when consulting with comorbidity. All adult patients consulting at their primary registered practice are included.

|                                    | Relative Risk (95% Confidence Interval) (p-value) |                              |
|------------------------------------|---------------------------------------------------|------------------------------|
|                                    | Women                                             | Men                          |
| Acne                               | 0.99 (0.94 – 1.05) (p=0.80)                       | 0.91 (0.87 – 0.97) (p<0.001) |
| Bronchitis                         | 1.05 (1.03 – 1.06) (p<0.001)                      | 1.06 (1.04 – 1.08) (p<0.001) |
| COPD (non-respiratory comorbidity) | 1.02 (0.98 – 1.05) (p=0.32)                       | 0.98 (0.94 – 1.03) (p=0.42)  |
| Cough                              | 1.19 (1.18 – 1.20) (p<0.001)                      | 1.17 (1.16 – 1.18) (p<0.001) |
| Gastroenteritis                    | 1.27 (1.18 – 1.40) (p<0.001)                      | 1.24 (1.14 – 1.35) (p<0.001) |
| ILI                                | 1.29 (1.18 – 1.40) (p<0.001)                      | 1.51 (1.38 – 1.65) (p<0.001) |
| Impetigo                           | 1.04 (0.98 – 1.10) (p=0.24)                       | 1.02 (0.95 – 1.09) (p=0.68)  |
| LRTI                               | 0.99 (0.99 – 1.00) (p=0.002)                      | 0.99 (0.98 – 0.99) (p<0.001) |
| Otitis media                       | 1.01 (0.99 – 1.03) (p=0.18)                       | 1.00 (0.98 – 1.03) (p=0.76)  |
| Sinusitis                          | 1.02 (1.02 – 1.03) (p<0.001)                      | 1.03 (1.02 – 1.04) (p<0.001) |
| Sore throat                        | 0.94 (0.93 – 0.95) (p<0.001)                      | 0.88 (0.87 – 0.90) (p<0.001) |
| URTI                               | 1.32 (1.30 – 1.35) (p<0.001)                      | 1.27 (1.24 – 1.30) (p<0.001) |

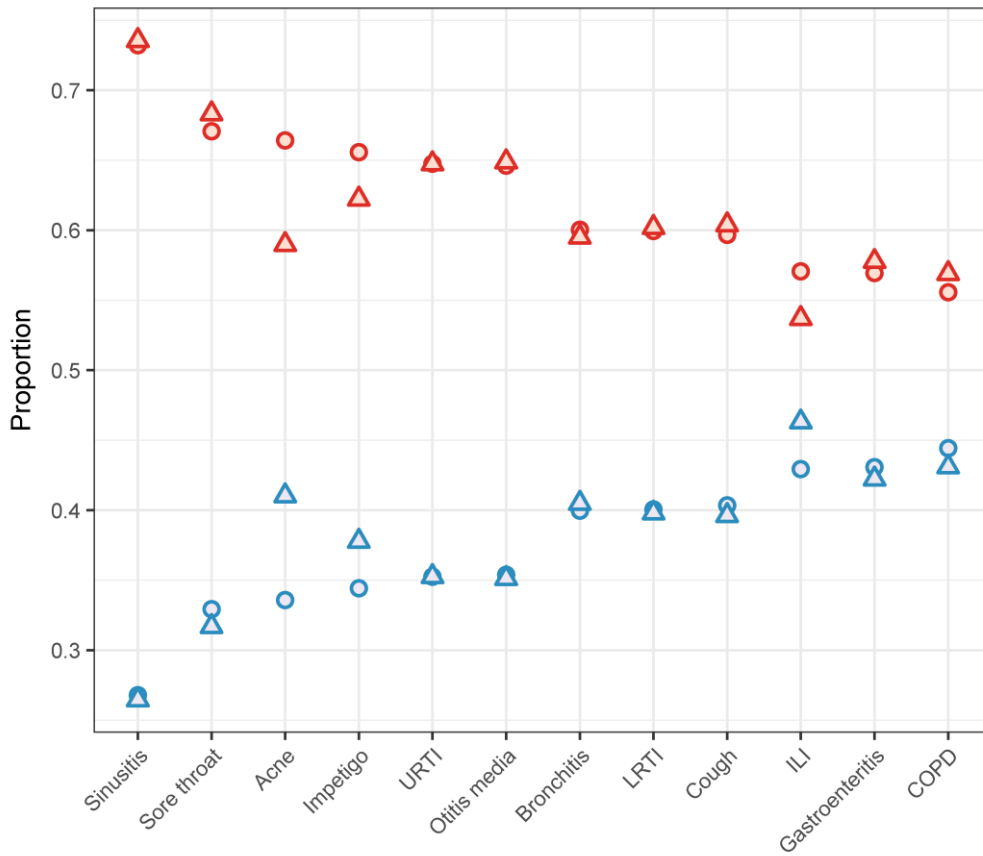

Figure S1. For common conditions in general practice, the proportions of all consultations (circles) and prescriptions (triangles) attributed to women (red) and men (blue). Consultations and prescriptions include all adult patients (aged 19-64) with comorbidity who consulted at their primary registered practice. Conditions are ordered by consultation proportion.

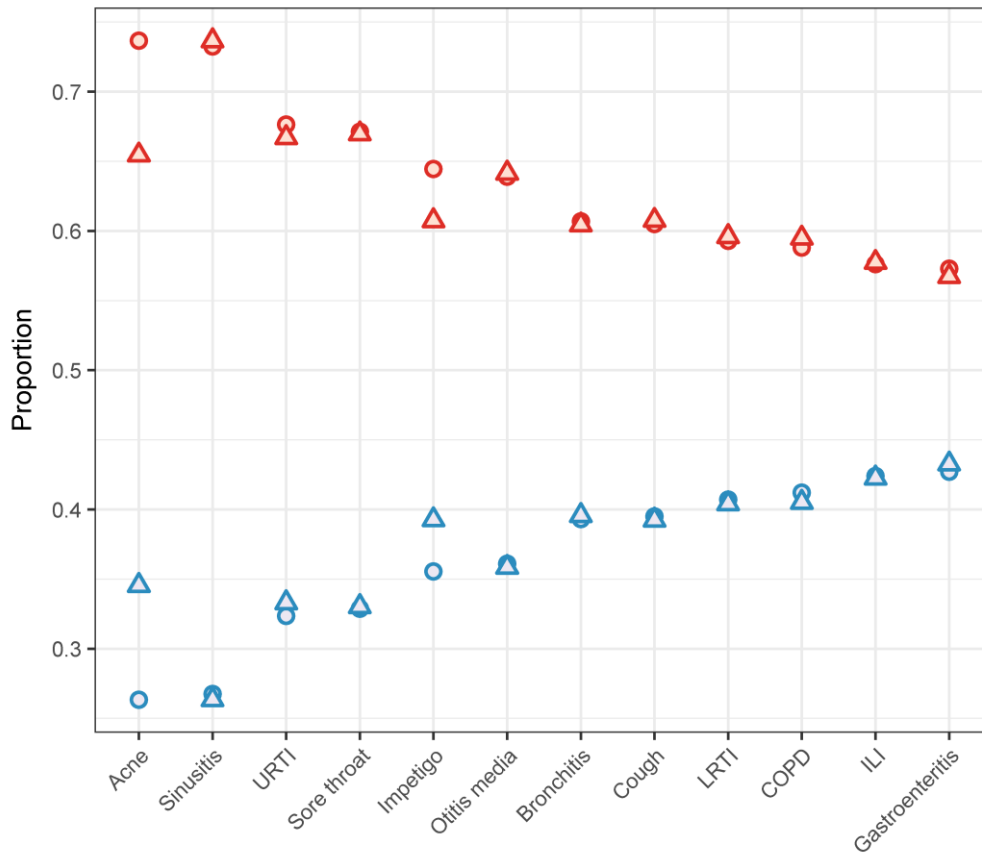

Figure S2. For common conditions in general practice, the proportions of all consultations (circles) and prescriptions (triangles) attributed to women (red) and men (blue). Consultations and prescriptions include all adult patients (aged 19-64) without comorbidity, including those who consulted outside their primary registered practice. Conditions are ordered by consultation proportion.

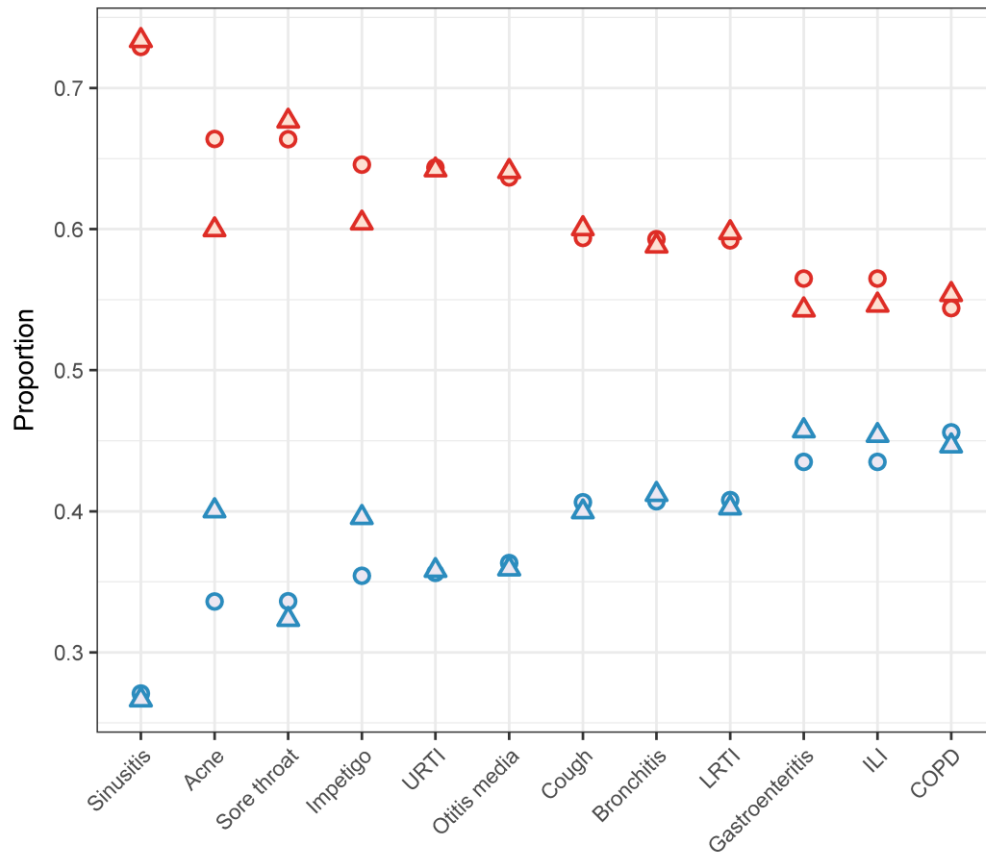

Figure S3. For common conditions in general practice, the proportions of all consultations (circles) and prescriptions (triangles) attributed to women (red) and men (blue). Consultations and prescriptions include all adult patients (aged 19-64) with comorbidity, including those who consulted outside their primary registered practice. Conditions are ordered by consultation proportion.

STROBE Statement—Checklist of items that should be included in reports of *cross-sectional studies*

|                              | Item No | Recommendation                                                                                                                                                                                                                                                                                                                                                                         |
|------------------------------|---------|----------------------------------------------------------------------------------------------------------------------------------------------------------------------------------------------------------------------------------------------------------------------------------------------------------------------------------------------------------------------------------------|
| <b>Title and abstract</b>    | 1       | (a) Indicate the study's design with a commonly used term in the title or the abstract<br><b>Provided, page 1</b><br>(b) Provide in the abstract an informative and balanced summary of what was done and what was found<br><b>Provided, pages 2-3</b>                                                                                                                                 |
| <b>Introduction</b>          |         |                                                                                                                                                                                                                                                                                                                                                                                        |
| Background/rationale         | 2       | Explain the scientific background and rationale for the investigation being reported<br><b>Introduction paragraphs 1-3, pages 4-5</b>                                                                                                                                                                                                                                                  |
| Objectives                   | 3       | State specific objectives, including any prespecified hypotheses<br><b>Introduction paragraph 4, page 5</b>                                                                                                                                                                                                                                                                            |
| <b>Methods</b>               |         |                                                                                                                                                                                                                                                                                                                                                                                        |
| Study design                 | 4       | Present key elements of study design early in the paper<br><b>Throughout methods, pages 6-8</b>                                                                                                                                                                                                                                                                                        |
| Setting                      | 5       | Describe the setting, locations, and relevant dates, including periods of recruitment, exposure, follow-up, and data collection<br><b>Methods paragraph 1, page 6</b>                                                                                                                                                                                                                  |
| Participants                 | 6       | (a) Give the eligibility criteria, and the sources and methods of selection of participants<br><b>Methods paragraphs 1-2, page 6</b>                                                                                                                                                                                                                                                   |
| Variables                    | 7       | Clearly define all outcomes, exposures, predictors, potential confounders, and effect modifiers. Give diagnostic criteria, if applicable<br><b>Methods paragraphs 3-4, pages 7-8</b>                                                                                                                                                                                                   |
| Data sources/<br>measurement | 8*      | For each variable of interest, give sources of data and details of methods of assessment (measurement). Describe comparability of assessment methods if there is more than one group<br><b>Methods paragraphs 1-2, page 6</b>                                                                                                                                                          |
| Bias                         | 9       | Describe any efforts to address potential sources of bias<br><b>Throughout methods, pages 6-8</b>                                                                                                                                                                                                                                                                                      |
| Study size                   | 10      | Explain how the study size was arrived at<br><b>Methods paragraph 1, page 6</b>                                                                                                                                                                                                                                                                                                        |
| Quantitative variables       | 11      | Explain how quantitative variables were handled in the analyses. If applicable, describe which groupings were chosen and why<br><b>Methods paragraphs 2-4, pages 6-8</b>                                                                                                                                                                                                               |
| Statistical methods          | 12      | (a) Describe all statistical methods, including those used to control for confounding<br>(b) Describe any methods used to examine subgroups and interactions<br>(c) Explain how missing data were addressed<br>(d) If applicable, describe analytical methods taking account of sampling strategy<br>(e) Describe any sensitivity analyses<br><b>Methods paragraphs 2-4, pages 6-8</b> |
| <b>Results</b>               |         |                                                                                                                                                                                                                                                                                                                                                                                        |
| Participants                 | 13*     | (a) Report numbers of individuals at each stage of study—eg numbers potentially eligible, examined for eligibility, confirmed eligible, included in the study, completing follow-up, and analysed<br>(b) Give reasons for non-participation at each stage                                                                                                                              |



|                          |     |                                                                                                                                                                                                              |
|--------------------------|-----|--------------------------------------------------------------------------------------------------------------------------------------------------------------------------------------------------------------|
|                          |     | (c) Consider use of a flow diagram                                                                                                                                                                           |
|                          |     | <b>Results paragraph 1, page 8</b>                                                                                                                                                                           |
| Descriptive data         | 14* | (a) Give characteristics of study participants (eg demographic, clinical, social) and information on exposures and potential confounders                                                                     |
|                          |     | (b) Indicate number of participants with missing data for each variable of interest                                                                                                                          |
|                          |     | <b>Results paragraph 1, page 8; Table 1, pages 9-10</b>                                                                                                                                                      |
| Outcome data             | 15* | Report numbers of outcome events or summary measures                                                                                                                                                         |
|                          |     | <b>Table 1, pages 9-10; online supplementary appendix Table S2, page 3</b>                                                                                                                                   |
| Main results             | 16  | (a) Give unadjusted estimates and, if applicable, confounder-adjusted estimates and their precision (eg, 95% confidence interval). Make clear which confounders were adjusted for and why they were included |
|                          |     | (b) Report category boundaries when continuous variables were categorized                                                                                                                                    |
|                          |     | (c) If relevant, consider translating estimates of relative risk into absolute risk for a meaningful time period                                                                                             |
|                          |     | <b>Table 1 and throughout results, pages 8-11</b>                                                                                                                                                            |
| Other analyses           | 17  | Report other analyses done—eg analyses of subgroups and interactions, and sensitivity analyses                                                                                                               |
|                          |     | <b>Results paragraphs 2-4, pages 8-11; online supplementary appendix Table S1 and Figures S1-S3, pages 1-2 and 4-6</b>                                                                                       |
| <b>Discussion</b>        |     |                                                                                                                                                                                                              |
| Key results              | 18  | Summarise key results with reference to study objectives                                                                                                                                                     |
|                          |     | <b>Discussion paragraph 1, pages 11-12</b>                                                                                                                                                                   |
| Limitations              | 19  | Discuss limitations of the study, taking into account sources of potential bias or imprecision. Discuss both direction and magnitude of any potential bias                                                   |
|                          |     | <b>Discussion paragraphs 2 and 5, pages 12 and 14</b>                                                                                                                                                        |
| Interpretation           | 20  | Give a cautious overall interpretation of results considering objectives, limitations, multiplicity of analyses, results from similar studies, and other relevant evidence                                   |
|                          |     | <b>Discussion paragraphs 4-6, pages 13-15</b>                                                                                                                                                                |
| Generalisability         | 21  | Discuss the generalisability (external validity) of the study results                                                                                                                                        |
|                          |     | <b>Discussion paragraph 2, page 12</b>                                                                                                                                                                       |
| <b>Other information</b> |     |                                                                                                                                                                                                              |
| Funding                  | 22  | Give the source of funding and the role of the funders for the present study and, if applicable, for the original study on which the present article is based                                                |
|                          |     | <b>Funding statement provided page 16</b>                                                                                                                                                                    |

\*Give information separately for exposed and unexposed groups.

**Note:** An Explanation and Elaboration article discusses each checklist item and gives methodological background and published examples of transparent reporting. The STROBE checklist is best used in conjunction with this article (freely available on the Web sites of PLoS Medicine at <http://www.plosmedicine.org/>, Annals of Internal Medicine at <http://www.annals.org/>, and Epidemiology at <http://www.epidem.com/>). Information on the STROBE Initiative is available at [www.strobe-statement.org](http://www.strobe-statement.org).
